# Supplementary material for: SORBS2 is a genetic factor contributing to cardiac malformation of 4q deletion syndrome patients
Source: eLife. 2021 Jun 8;10:e67481. doi: 10.7554/eLife.67481 (PMC8186900; doi:10.7554/eLife.67481)
Supplement: Supplementary file 4. [file elife-67481-supp4.csv]

X	baseMean	log2FoldChange	lfcSE	stat	pvalue	padj
Rrs1	1438.539387	-0.255366878	0.121628978	-2.099556233	0.035767896	0.2963041
Bag2	491.3163257	-0.259434461	0.126167512	-2.056269931	0.039756505	0.312995539
Cnnm3	727.9875119	-0.265020029	0.107711228	-2.460467983	0.013875595	0.210038669
Snord89	35.11261369	-0.530104284	0.224486851	-2.361404608	0.018205855	0.232905359
Hspd1	18589.13699	-0.389381202	0.127369242	-3.057105427	0.002234857	0.089719806
4930558J18Rik	61.90612043	-0.358416422	0.154921613	-2.313534016	0.020693297	0.244540297
Fzd7	2311.370932	-0.296790212	0.138014714	-2.150424432	0.031521657	0.282267802
D630023F18Rik	5.902204242	-1.24957815	0.51174479	-2.441799454	0.014614262	0.216304074
Zfp142	843.4645944	-0.336532741	0.119864911	-2.807600151	0.004991216	0.131414895
Des	986.0642352	-0.393825301	0.175158965	-2.248387919	0.024551465	0.260266234
C130036L24Rik	89.45466565	-0.524816373	0.169124443	-3.103137331	0.001914808	0.083694811
Platr5	2.860453547	-1.39352114	0.696629459	-2.000376417	0.045459633	NA
D130058E05Rik	45.9030749	-0.568973381	0.213148929	-2.669370118	0.007599366	0.161644995
Zcchc2	528.1891044	-0.258483204	0.107930374	-2.394906961	0.016624583	0.226223136
Rassf5	95.03249314	-0.459322675	0.132928982	-3.455399022	0.000549479	0.047197033
Slc26a9	5.255662142	-1.435444213	0.63602391	-2.256902909	0.024014142	0.256807048
Slc45a3	194.81013	-0.33514063	0.135940768	-2.465343064	0.013688212	0.208720168
Cdk18	114.0915817	-0.394464761	0.16412293	-2.403471353	0.016240239	0.22577426
Sox13	1340.83464	-0.492969484	0.171698652	-2.871131944	0.004090048	0.121303465
Trmt1l	915.1029244	-0.36024371	0.08931941	-4.033207451	5.50E-05	0.018696921
Lhx4	130.8337171	-0.589282636	0.244284672	-2.412278389	0.015853172	0.224320762
Tnfsf18	4.646206604	-2.57893592	0.748555129	-3.445218422	0.000570598	0.048233867
5330438I03Rik	14.88777152	-0.931383693	0.410228737	-2.270400896	0.02318327	0.253433772
Tstd1	46.72118666	-0.463296732	0.231100681	-2.004739795	0.044990872	0.330018946
Slamf8	1.265695876	-2.926408364	1.23195608	-2.375416147	0.017529175	NA
6330403A02Rik	146.5268249	-0.746616244	0.225144531	-3.316164247	0.000912622	0.062923318
Atf3	75.24677978	-0.420658367	0.205705912	-2.044950305	0.040859758	0.316596342
D730003I15Rik	37.20225702	-0.493344123	0.228266145	-2.161267164	0.030674708	0.280167154
Entpd2	2.780348001	-2.820257206	1.430086475	-1.972088581	0.048599495	NA
Lhx3	85.43998863	-0.434172919	0.197864343	-2.194295916	0.028214143	0.271285288
6530402F18Rik	106.7365097	-0.324173215	0.138836095	-2.334934692	0.019546833	0.23852086
Mir219a-2	63.91412143	-0.458419328	0.229077317	-2.001155475	0.045375638	0.33036718
Cercam	502.9743156	-0.357184917	0.127108863	-2.810070905	0.004953059	0.131118251
Pkn3	455.5527052	-0.318430713	0.127431281	-2.498842594	0.012459964	0.19987559
D2Wsu81e	984.3208199	-0.256664184	0.071706123	-3.579390058	0.000344397	0.039264908
Ier5l	935.0714233	-0.262036601	0.133143457	-1.96807719	0.049059157	0.341506698
1700001O22Rik	38.04156212	-0.47705399	0.204003096	-2.338464464	0.019363167	0.237945457
Ptges	237.8125914	-0.264928411	0.102840046	-2.576121088	0.009991565	0.182023575
Eng	651.2249563	-0.462969325	0.170413741	-2.716737062	0.006592896	0.147750086
Hspa5	21454.21788	-0.389445011	0.121419132	-3.207443547	0.001339203	0.072635427
Nr6a1	549.6968353	-0.654489705	0.180873469	-3.618494801	0.000296321	0.037664492
Nr4a2	222.6866989	-0.322463424	0.132145596	-2.44021318	0.014678597	0.216650513
Gyltl1b	342.9362425	-0.356114058	0.144281895	-2.468182568	0.013580104	0.207642157
Slc35c1	282.1345576	-0.333688234	0.155278293	-2.148968975	0.031636859	0.282618527
Tspan18	1326.276423	-0.384332718	0.192212605	-1.999518799	0.04555225	0.331073991
Aven	296.8212736	-0.335980481	0.126970071	-2.646139195	0.008141631	0.16671906
Actc1	6919.191396	-0.344000344	0.159116579	-2.161939045	0.030622875	0.280013004
Pdia3	13223.27822	-0.266237546	0.080271931	-3.316695413	0.000910889	0.062923318
Dusp2	48.18794526	-0.462334754	0.225279083	-2.052275548	0.040142891	0.314126765
Fbln7	57.15113886	-0.494818488	0.166498342	-2.971912406	0.002959511	0.102309502
BC039771	25.37357877	-0.515980899	0.241922991	-2.132831182	0.032938577	0.287366808
Foxa2	120.6566381	-0.544643399	0.242640052	-2.244655799	0.024790238	0.260266234
Tcf15	244.2205414	-0.479803884	0.240420287	-1.99568801	0.045967893	0.332354053
Zcchc3	2054.196819	-0.253254315	0.123105928	-2.057206499	0.039666367	0.312877627
2500004C02Rik	281.4526033	-0.290490404	0.145102421	-2.001968	0.045288173	0.330077575
Mybl2	1558.708389	-0.321576186	0.099903849	-3.21885684	0.001287027	0.070727031
Jph2	310.2504291	-0.470547008	0.209028823	-2.251110644	0.02437853	0.259378218
Pigt	1331.03082	-0.315079747	0.141769856	-2.222473488	0.026251324	0.265129896
Zswim3	178.462843	-0.277069876	0.13378232	-2.071050019	0.038354122	0.307673431
Eya2	583.8928276	-0.287793138	0.146541323	-1.963904329	0.049541188	0.343090679
Snai1	694.4312522	-0.342199036	0.144340271	-2.370780061	0.01775059	0.231060853
Kcng1	62.66638314	-0.864781593	0.245537121	-3.521999404	0.000428305	0.042305259
Sall4	708.9114465	-0.684565379	0.215940219	-3.170161554	0.001523542	0.075277444
Gata5	144.3669238	-0.444790972	0.212476634	-2.093364169	0.036316658	0.297446473
Tcfl5	49.5640886	-0.456703913	0.228554278	-1.998229552	0.045691779	0.331274805
9230112E08Rik	103.6979523	-0.320078432	0.162508444	-1.969611081	0.048882961	0.341506698
Gyg	1406.258058	-0.299653229	0.148252047	-2.021241759	0.043254745	0.324869083
Noct	446.9429491	-0.351348927	0.104742579	-3.354404003	0.000795361	0.058860282
Mgarp	98.90940561	-0.45447913	0.197054246	-2.306365581	0.021090213	0.245686229
Setd7	1570.698697	-0.277270326	0.079254026	-3.498501445	0.000467881	0.044621563
Ntrk1	151.896872	-0.579938674	0.151254061	-3.834202337	0.000125972	0.028097558
Ubqln4	3233.047955	-0.288944086	0.096133117	-3.005666468	0.002649995	0.097850132
Muc1	90.92206773	-0.358915509	0.177798409	-2.018665469	0.043522001	0.326216191
Nup210l	144.2708914	-0.346731105	0.172129196	-2.01436545	0.043971179	0.327004958
Dennd4b	704.6630856	-0.251017239	0.091490889	-2.743630997	0.00607638	0.141705604
Ints3	2902.790422	-0.290569125	0.101743007	-2.855912497	0.004291334	0.123838822
Anxa9	44.27231371	-0.380594165	0.192114405	-1.981080827	0.04758221	0.338296917
Ecm1	324.7390186	-0.282181868	0.123205732	-2.290330673	0.022002155	0.248884431
Adora3	1.030410011	-2.790430568	1.327034591	-2.102756467	0.035487063	NA
Ovgp1	76.06897352	-0.489039647	0.212297182	-2.303561652	0.021247263	0.245686229
Ubl4b	19.31911945	-0.633165337	0.29955445	-2.113690305	0.034541727	0.292785743
Mybphl	34.54327637	-0.682911873	0.247662928	-2.757424693	0.005825863	0.138977717
S1pr1	349.9114769	-0.288461812	0.119545846	-2.412980642	0.01582266	0.224320762
Gar1	1370.2992	-0.336418369	0.133961456	-2.511307209	0.012028497	0.1953127
Lpar3	59.62197246	-0.568030824	0.221085175	-2.569284998	0.010190861	0.182391341
Ubap2	3823.469272	-0.321683487	0.128500596	-2.503361834	0.01230197	0.197722111
Cntfr	1235.696619	-0.394592303	0.192111204	-2.053978609	0.039977762	0.313699207
Sigmar1	1010.574482	-0.349707905	0.115455427	-3.028942985	0.00245411	0.094261297
Erp44	993.8574853	-0.263198947	0.088027169	-2.98997401	0.002790012	0.099265999
Ak4	1275.420263	-0.479274101	0.146835504	-3.264020534	0.001098432	0.066028852
Trabd2b	255.5888594	-0.298662506	0.120738221	-2.473636802	0.013374559	0.206080861
Foxd2os	297.6273017	-0.268204134	0.108608122	-2.469466637	0.013531464	0.207420763
Foxe3	14.5376014	-1.273616943	0.599613757	-2.124062247	0.033664939	0.290724294
Btbd19	74.56328207	-0.517241299	0.170959379	-3.02552163	0.002482047	0.094790267
Slc2a1	4540.438154	-0.466184241	0.144065543	-3.235917695	0.001212523	0.068439753
Zfp691	283.9974281	-0.358082151	0.099369955	-3.603525354	0.00031393	0.038435664
Gja4	195.1540362	-0.523769596	0.177081583	-2.957786961	0.003098562	0.104449868
Tlr12	19.36493383	-0.862603312	0.308846596	-2.792983065	0.005222443	0.133148923
Hpca	83.21697819	-0.514318852	0.1803175	-2.852295824	0.004340469	0.12410101
Matn1	2.094811962	-2.375794773	1.101109657	-2.157636852	0.030956077	NA
Sesn2	345.6506818	-0.474041528	0.170347774	-2.782786748	0.005389422	0.135646066
Nudc	6207.300616	-0.283322566	0.112016988	-2.529282143	0.011429611	0.192808522
Rps6ka1	810.3709869	-0.257585545	0.13067859	-1.971138081	0.048708084	0.341489813
Lin28a	1221.579819	-1.040320243	0.334737287	-3.107870807	0.001884404	0.083008506
Grrp1	247.9492433	-0.428720666	0.2000961	-2.142573824	0.032147335	0.284402698
Aunip	454.7307413	-0.39868421	0.124748416	-3.195905989	0.001393925	0.07321845
Man1c1	405.4054356	-0.3671402	0.145753086	-2.518918877	0.011771577	0.194313635
Mir6403	1.183924792	-2.611848571	1.233979217	-2.116606614	0.034293248	NA
Zbtb40	634.3444707	-0.39791827	0.139787695	-2.8465901	0.004419022	0.124930986
Alpl	241.6778227	-0.556522493	0.164914822	-3.37460567	0.000739215	0.056984602
Iffo2	483.1833256	-0.254885166	0.110128962	-2.314424475	0.02064445	0.244488429
Plod1	828.9500193	-0.329286753	0.116272374	-2.832029148	0.004625363	0.126208747
Agtrap	426.7064552	-0.274702127	0.126307322	-2.17487097	0.029639787	0.276002647
Srm	1824.099788	-0.348972276	0.153095544	-2.279441104	0.022640857	0.251288111
Eno1	49817.68602	-0.377233088	0.141420535	-2.667456239	0.007642784	0.161908396
Klhl21	290.9641434	-0.425314211	0.161929836	-2.626533952	0.008625939	0.170380195
Tnfrsf25	67.49034601	-0.514295243	0.235074861	-2.187793457	0.028684651	0.272604681
Gpr153	451.3309086	-0.32125194	0.112101497	-2.865723917	0.004160569	0.121713146
Hes3	43.0441715	-1.155780979	0.371357571	-3.112312954	0.001856276	0.082713914
Cfap74	157.5366827	-0.285642391	0.12409092	-2.301879864	0.021341948	0.246438819
9430015G10Rik	2027.651881	-0.30699257	0.120293797	-2.552023277	0.010709936	0.184990819
AI506816	2794.380964	-0.285518926	0.120823636	-2.363104904	0.018122539	0.232905359
2700038G22Rik	375.703226	-0.483354175	0.177824405	-2.718154318	0.006564721	0.147513951
Kcnh2	809.045011	-0.346715331	0.124895877	-2.776035047	0.005502628	0.135920873
Nos3	123.4311539	-0.475761424	0.149660623	-3.178935203	0.001478171	0.074010309
Gbx1	70.85555257	-0.619506008	0.190536705	-3.251373583	0.001148488	0.066553243
Mnx1	52.59558656	-0.898428001	0.295315638	-3.042263555	0.002348062	0.092628505
Abhd1	3.348878832	-1.788736394	0.800400589	-2.234801445	0.025430387	0.262843807
Nat8l	288.68865	-0.498594326	0.190781944	-2.613425128	0.008963972	0.173325163
Adra2c	9.749719191	-1.049975726	0.480209547	-2.186494902	0.028779417	0.272604681
Ppp2r2c	71.50404544	-0.399958151	0.177667731	-2.251158099	0.024375526	0.259378218
Bend4	896.500249	-0.509110223	0.11890182	-4.281769796	1.85E-05	0.009647836
Slc10a4	122.0140078	-0.427943827	0.193009085	-2.217221158	0.026607982	0.265129896
Noa1	568.3824764	-0.288293028	0.121096549	-2.380687391	0.017280369	0.228452831
Csn3	15.01253345	-0.860244711	0.37082677	-2.319802077	0.020351587	0.243505871
Prdm8	88.77993008	-0.773179205	0.243153828	-3.179794505	0.001473795	0.074010309
Nkx6-1	278.4145649	-0.725094938	0.341635596	-2.122422098	0.033802308	0.290724294
Srrd	226.0837311	-0.25239921	0.109330101	-2.3085976	0.020965921	0.245686229
Alkbh2	90.86513427	-0.332848007	0.151195527	-2.201440832	0.027704831	0.268896673
Gltp	794.3978971	-0.272060339	0.127001719	-2.142178395	0.032179129	0.284402698
Mlec	9606.502562	-0.271843716	0.070109774	-3.877401125	0.000105578	0.025417801
Cabp1	183.3222079	-0.563977548	0.170021708	-3.317091422	0.000909598	0.062923318
Msi1	4082.897398	-0.323025611	0.14824177	-2.179045829	0.029328264	0.274814249
Ccdc64	200.0937111	-0.261483291	0.129707234	-2.015949944	0.04380521	0.326787935
Tpcn1	1143.597987	-0.261046597	0.124931702	-2.089514457	0.036661438	0.299534331
Atp2a2	6863.528529	-0.408955658	0.124718819	-3.279021264	0.001041678	0.065569052
Rhof	60.8137112	-0.361121725	0.17407337	-2.074537447	0.038029425	0.30635121
Setd8	2379.694195	-0.368855356	0.106262721	-3.471164224	0.000518207	0.04589715
Rilpl1	549.3477486	-0.28933996	0.114438609	-2.528342159	0.01146026	0.192808522
Fam101a	95.2040439	-0.384316313	0.177442015	-2.165869866	0.030321133	0.279091863
Dhx37	1024.67023	-0.254471795	0.122148793	-2.083293574	0.037224472	0.302097065
Slc15a4	431.1860545	-0.251588409	0.096318004	-2.612060035	0.008999845	0.173325163
Dnajc30	109.393303	-0.354102168	0.146460529	-2.417731054	0.015617615	0.22207422
Pom121	3110.200672	-0.308300735	0.144432143	-2.134571501	0.032796027	0.287366808
Sh2b2	477.8255746	-0.27815351	0.123712467	-2.248387065	0.024551519	0.260266234
Epo	17.41707779	-0.959612518	0.342939259	-2.798199656	0.005138834	0.131843944
Irs3	7.79270192	-0.821622214	0.398843463	-2.060011735	0.039397419	0.31203763
BC037034	1022.662987	-0.259448212	0.118902012	-2.182033817	0.029107037	0.274284818
Elfn1	59.4944421	-0.52892215	0.210338508	-2.514623468	0.011915957	0.194904324
Chst12	215.7826274	-0.342866103	0.149167673	-2.298528192	0.021531745	0.247429324
Grifin	2.320982257	-2.069529534	0.972158872	-2.128797664	0.033271004	NA
Lfng	752.2914329	-0.330080046	0.129272348	-2.55336931	0.010668631	0.184660469
Radil	136.2597635	-0.313319187	0.136403387	-2.297004456	0.021618516	0.248084012
Baiap2l1	144.1503422	-0.450241805	0.146324667	-3.07700551	0.002090914	0.086822481
Nptx2	70.5817448	-0.485989006	0.178595954	-2.721164698	0.006505234	0.146972394
Flt1	479.1075173	-0.31886919	0.148844332	-2.142299854	0.032169361	0.284402698
Hsph1	5886.367556	-0.73350995	0.148021377	-4.955432544	7.22E-07	0.00109245
1110019D14Rik	71.24037192	-0.313930542	0.158451248	-1.981243737	0.047563947	0.338296917
Impdh1	789.9984646	-0.254310559	0.098323644	-2.586463939	0.009696632	0.179366629
Tmem140	69.21391312	-0.484745423	0.17663918	-2.744268979	0.006064582	0.141628837
Pdia4	6331.946974	-0.307411982	0.098535778	-3.119800613	0.001809735	0.081597647
Repin1	842.3121315	-0.372922944	0.119492325	-3.120894523	0.001803026	0.081597647
Gimap1	52.60883561	-0.404116938	0.184810566	-2.186654945	0.028767723	0.272604681
Hoxa1	78.33408428	-0.665993801	0.180953662	-3.680466004	0.000232808	0.033708588
Hoxaas2	319.3404649	-0.25155777	0.123220171	-2.041530761	0.0411981	0.317293966
Crhr2	7.466660457	-1.011707216	0.51151241	-1.977874234	0.047942896	0.338979689
Adcyap1r1	687.5711758	-0.364259585	0.184193131	-1.977595918	0.04797431	0.339057826
Vmn1r4	6.123367596	-1.011668411	0.482558179	-2.096469305	0.03604058	0.297212366
Tacr1	17.32934696	-0.647417991	0.309975886	-2.0886076	0.03674306	0.30005331
Hk2	1572.558824	-0.368686689	0.130812494	-2.818436362	0.004825818	0.128567503
Mthfd2	1477.281137	-0.295843921	0.130054917	-2.274761519	0.02292024	0.252243829
Sfxn5	219.0994309	-0.351481076	0.113857423	-3.087028204	0.002021684	0.085812274
Tgfa	59.37278756	-0.625424796	0.200378311	-3.12122002	0.001801034	0.081597647
Creld1	469.2414835	-0.370063129	0.154103799	-2.401388748	0.016332975	0.22577426
Cecr2	1343.626151	-0.366584147	0.11575454	-3.166909462	0.001540683	0.075452673
Tpi1	14732.33588	-0.284585921	0.137992241	-2.062332772	0.039176065	0.31117519
Kcna5	93.27124991	-0.638999908	0.177083377	-3.60846917	0.000308009	0.038245298
Ybx3	3192.634934	-0.301824277	0.125761344	-2.399976561	0.016396122	0.22581623
Bcat1	2193.774976	-0.323398483	0.115517476	-2.799563279	0.005117179	0.131599895
Cnot3	2175.732464	-0.28117165	0.091237017	-3.081771615	0.002057726	0.086079525
Leng1	274.334621	-0.258616936	0.112852462	-2.291637526	0.021926568	0.248874769
2810047C21Rik1	1.389301327	-2.475612848	1.262708494	-1.960557689	0.049930642	NA
Pla2g4c	160.4348351	-0.364959588	0.178919926	-2.039792866	0.041370961	0.317855824
Cabp5	7.156605196	-1.592172595	0.499091593	-3.19014108	0.001422034	0.07375281
Mypop	51.14333742	-0.423350053	0.190540434	-2.221838401	0.026294228	0.265129896
Sympk	5029.828538	-0.253865888	0.114465596	-2.217835716	0.026566036	0.265129896
Dmpk	852.3718007	-0.380608781	0.164124598	-2.319023388	0.020393768	0.243505871
Exoc3l2	154.0215303	-0.574540885	0.188451714	-3.04874322	0.002298008	0.091289179
Pvrl2	1758.045161	-0.258522509	0.109441839	-2.36219084	0.018167287	0.232905359
Pvr	223.6633711	-0.26032582	0.127644822	-2.039454605	0.041404677	0.317855824
Zfp428	791.8121742	-0.260427377	0.130835912	-1.990488496	0.04653715	0.334148376
Dedd2	350.7908178	-0.3139735	0.15438401	-2.033717749	0.041980062	0.320059526
Ccdc97	1246.953919	-0.254878373	0.09635003	-2.645337748	0.008160941	0.16671906
Snrpa	3299.796809	-0.252523162	0.104405821	-2.418669368	0.015577392	0.221794266
Nccrp1	4.374003885	-1.796067053	0.738886655	-2.430774789	0.015066576	0.218620633
Pak4	1311.015565	-0.295915091	0.132928077	-2.226129329	0.02600552	0.265094075
Rps12-ps5	1.889751528	-1.904674577	0.901224334	-2.113430037	0.034563977	NA
Lsr	241.7593599	-0.298917825	0.138109252	-2.16435771	0.030436907	0.279517151
Gpi1	6354.446302	-0.298894611	0.092495814	-3.231439319	0.001231685	0.068930032
Lrp3	1578.510677	-0.258626082	0.111249484	-2.324739603	0.020085888	0.241480235
Syt3	27.42574003	-0.707592857	0.236333277	-2.994046658	0.002753038	0.098756412
Kcnc3	222.2608872	-0.473466498	0.151744836	-3.120149002	0.001807596	0.081597647
Med25	2997.173043	-0.296411658	0.113697134	-2.607028394	0.009133179	0.173405425
Bcl2l12	438.6486799	-0.259730087	0.121292828	-2.141347435	0.032246031	0.284608131
Hrc	146.9857485	-0.365607255	0.158598911	-2.305231808	0.021153594	0.245686229
Gys1	1182.193701	-0.257580991	0.1067908	-2.412014809	0.015864637	0.224320762
Rasip1	164.7751116	-0.388147716	0.167644178	-2.31530686	0.020596145	0.24426382
Sec1	64.67569263	-0.792582376	0.244332932	-3.243862259	0.001179208	0.067398571
Spaca4	7.802126924	-1.109371323	0.509026513	-2.179397919	0.029302121	0.274725836
Ldha	30798.67715	-0.351237893	0.148751839	-2.361233965	0.018214235	0.232905359
Fam174b	277.0991214	-0.29944799	0.126991142	-2.35802265	0.018372572	0.233187707
Aen	1398.418853	-0.291600633	0.085000974	-3.430556352	0.000602345	0.050400221
Isg20	16.3930053	-1.155385628	0.337358888	-3.424796762	0.000615259	0.050716266
Alpk3	184.7428359	-0.360007954	0.17306603	-2.08017688	0.037509312	0.303482777
Prss23os	5.815487193	-1.328075211	0.598937265	-2.217386174	0.026596714	0.265129896
Mogat2	593.7429019	-0.629674398	0.295313418	-2.132224141	0.032988425	0.287436034
Rnf169	1153.619945	-0.251854586	0.092629985	-2.718931525	0.006549316	0.147368471
Rbmxl2	1.557248387	-2.717692817	1.291154029	-2.104855622	0.035303878	NA
Scube2	190.577705	-0.623211406	0.219204655	-2.843057351	0.004468303	0.125074098
Swap70	673.4668043	-0.252175752	0.088112161	-2.861985782	0.004209958	0.122389752
Mical2	425.8250079	-0.360381189	0.170233457	-2.116982142	0.034261363	0.292107508
Plk1	2505.065404	-0.300364485	0.127942596	-2.347650376	0.018892245	0.236167251
Sh2b1	2114.195759	-0.268645971	0.095163552	-2.822992264	0.004757772	0.127571113
Atxn2l	6221.077332	-0.259476706	0.105196546	-2.466589592	0.01364066	0.208185728
Aldoa	10925.52679	-0.425012544	0.130602147	-3.254253889	0.001136906	0.066553243
Bag3	425.2287782	-0.608112373	0.211276423	-2.87827844	0.00399852	0.120614789
Nkx1-2	22.20097442	-0.855210901	0.39060108	-2.189473979	0.028562408	0.272545933
Bnip3	662.9949346	-0.342235584	0.151241539	-2.262841192	0.023645481	0.255152928
Lrrc27	71.87704819	-0.335148712	0.157648273	-2.125926947	0.033509343	0.290156713
Adam8	201.8418076	-0.428926012	0.180595043	-2.375070799	0.017545584	0.230403412
B230206H07Rik	1.42923032	-2.576552799	1.16949544	-2.203131975	0.027585448	NA
C330021F23Rik	65.11362291	-0.619417921	0.189607987	-3.266834542	0.001087572	0.066028852
Atp4b	4.695853023	-1.35083934	0.629061493	-2.147388379	0.031762375	0.283237403
Kbtbd11	736.7767382	-0.471000484	0.194600085	-2.420350857	0.015505538	0.221178896
Thsd1	273.1786149	-0.329978861	0.108670749	-3.036501206	0.002393412	0.093113773
Tpte	1.79897604	-2.041795209	1.027073254	-1.987974277	0.046814535	NA
Zfp703	852.2647814	-0.351578723	0.126860534	-2.771379808	0.005581928	0.136884647
Rab11fip1	377.7947861	-0.324781984	0.144921365	-2.241091124	0.025020173	0.261378837
Fut10	412.9321732	-1.202341216	0.148522616	-8.095340933	5.71E-16	4.75E-12
5930422O12Rik	6.309518038	-1.033852827	0.501289196	-2.062388011	0.03917081	0.31117519
Rbpms	907.7746952	-0.364164909	0.146797129	-2.480735907	0.013111147	0.20368695
Saraf	1382.846063	-0.294110249	0.071066252	-4.138536082	3.50E-05	0.013534897
6430573F11Rik	135.9082278	-0.272584435	0.124387772	-2.191408615	0.028422236	0.272329596
Sorbs2	400.6694894	-0.454837028	0.160576788	-2.832520391	0.004618262	0.126208747
1700029J07Rik	68.5196013	-0.545069496	0.203488319	-2.678627935	0.007392449	0.15882795
Dctd	1270.146056	-0.416214254	0.075454657	-5.516084368	3.47E-08	8.25E-05
Naf1	479.0917771	-0.368247593	0.131704954	-2.796004105	0.005173874	0.132538741
Snora68	4.165538108	-1.828637597	0.715596963	-2.555401563	0.010606536	0.184660469
Ocel1	445.8399424	-0.604377846	0.164937875	-3.664275687	0.00024804	0.034417549
Nr2f6	967.1121996	-0.309417555	0.151417855	-2.043468096	0.041006123	0.316596342
Plvap	912.7702729	-0.419994858	0.197929933	-2.121937047	0.033843025	0.290774101
Fam129c	115.0158259	-0.516697505	0.171866989	-3.00638015	0.002643783	0.097850132
Jak3	154.1081043	-0.379188997	0.123544007	-3.069262576	0.002145879	0.088224767
Cherp	3267.358899	-0.280028554	0.088892873	-3.15018003	0.001631699	0.078073037
Dnajb1	2052.420343	-0.386418747	0.167140494	-2.311939721	0.020781005	0.244540297
Samd1	1115.497419	-0.417911603	0.111498966	-3.748120876	0.000178164	0.029697458
Calr	16410.65932	-0.411531475	0.114811988	-3.584394645	0.000337861	0.039067514
Rtbdn	41.34303128	-0.372224935	0.189354121	-1.965760944	0.049326231	0.342738715
Mylk3	237.0886398	-0.276340977	0.13877781	-1.991247577	0.046453676	0.333692904
Sall1	1100.834142	-0.398262087	0.170410339	-2.337077014	0.01943518	0.238063899
Cpne2	204.1721985	-0.405712468	0.143140913	-2.834357136	0.004591798	0.126144361
Adgrg3	107.2562003	-0.446445229	0.140257842	-3.183032208	0.001457414	0.074010309
Tepp	55.71979263	-0.43579107	0.200572367	-2.172737339	0.029800092	0.27658672
Fhod1	856.8626669	-0.298927785	0.11506994	-2.597792136	0.009382527	0.175773619
Fam65a	756.7843977	-0.2585291	0.098415014	-2.626927419	0.008615971	0.170380195
Enkd1	627.7508866	-0.299535787	0.082024272	-3.651794531	0.000260414	0.035493962
Plcg2	240.5253788	-0.539425117	0.219158279	-2.461349485	0.013841546	0.209713909
A130014A01Rik	76.29414726	-0.316685687	0.161052228	-1.966353965	0.049257737	0.342602582
Cdt1	1770.468311	-0.319175009	0.105642507	-3.021274472	0.002517131	0.095473221
Ccsap	194.2309872	-0.283273644	0.117723236	-2.406267898	0.016116441	0.22577426
Smco4	320.9452597	-0.304436683	0.101131322	-3.010310527	0.002609807	0.096999776
Raver1	2614.504303	-0.33622687	0.128134722	-2.624010611	0.008690108	0.170550277
Carm1	3166.99258	-0.272951578	0.114313672	-2.387742199	0.016952229	0.227719904
Tbx20	425.4154497	-0.430905954	0.150384934	-2.86535322	0.004165443	0.121713146
Pknox2	939.4949083	-0.371289236	0.11741285	-3.162253838	0.00156553	0.076249515
Slc37a2	139.1292401	-0.385002848	0.11915544	-3.231097541	0.001233158	0.068930032
Hspa8	83927.61308	-0.503025634	0.1470171	-3.421545074	0.000622664	0.051073787
Hyou1	4379.678446	-0.518894925	0.132824183	-3.906629914	9.36E-05	0.023975476
Scn4b	52.89396918	-0.820501144	0.322656099	-2.54295873	0.010991821	0.188297133
Zbtb16	570.1313483	-0.644628717	0.174790046	-3.688017324	0.000226008	0.033303218
Crabp1	9191.189248	-0.309001286	0.137753725	-2.243142868	0.024887603	0.260631118
1700017B05Rik	656.2158735	-0.443103673	0.147486729	-3.004363009	0.002661376	0.097965283
Cox5a	1828.826784	-0.252824503	0.117386378	-2.15378059	0.031257383	0.281411803
Arid3b	1314.119167	-0.356591187	0.114002981	-3.127911066	0.001760534	0.081597647
Pml	782.2526436	-0.252173475	0.117243593	-2.150850796	0.031487978	0.282267802
Pkm	61803.08583	-0.264311493	0.11533566	-2.291671912	0.021924582	0.248874769
Igdcc3	5943.529226	-0.844994071	0.256245947	-3.297589999	0.000975184	0.063497949
Rbpms2	559.2210814	-0.3897711	0.153503451	-2.539168316	0.011111635	0.189082296
Fam81a	97.42136537	-0.459016565	0.17789484	-2.580269126	0.009872334	0.180840749
Prtg	1601.598902	-0.764577427	0.182386379	-4.192075261	2.76E-05	0.011506435
Tinag	11.26441106	-0.889235725	0.418364766	-2.12550338	0.033544632	0.290156713
Mlip	44.38587343	-0.516866573	0.240618464	-2.148075276	0.031707776	0.282940074
Spsb4	1111.748597	-0.389830399	0.179700936	-2.169328703	0.030057738	0.277588125
Manf	1703.985389	-0.557897654	0.165763202	-3.365630285	0.00076369	0.0582915
Slc38a3	232.4517845	-0.410581186	0.11814805	-3.475141444	0.000510584	0.045463824
Dalrd3	695.6730235	-0.254636033	0.118537247	-2.148152075	0.031701676	0.282940074
Trim71	1065.214521	-0.609330412	0.159606061	-3.817714742	0.000134694	0.028433762
Xylb	273.3417359	-0.369689684	0.11630751	-3.178553838	0.001480117	0.074010309
4930516B21Rik	563.9127792	-0.279218501	0.112317692	-2.485970778	0.012919857	0.203143103
Xirp1	123.6522562	-0.653846031	0.2602364	-2.512507973	0.01198764	0.1953127
Cck	56.89794008	-0.823375299	0.266142456	-3.093739014	0.001976513	0.084821942
Pomgnt2	225.5284897	-0.380491555	0.147938257	-2.571961858	0.010112403	0.182391341
Tmem158	105.4401222	-0.389766332	0.19657685	-1.982768228	0.047393325	0.337290943
Cited2	1363.535065	-0.392918183	0.128731656	-3.052226583	0.002271506	0.090702256
E030030I06Rik	83.3160497	-0.333889522	0.14390433	-2.320218734	0.020329048	0.243505871
Arg1	735.356997	-0.425318592	0.189504837	-2.244367999	0.024808734	0.260296298
Wasf1	920.9402438	-0.331541951	0.169024936	-1.961497275	0.049821043	0.343579064
Scml4	37.86777497	-0.694817321	0.314823135	-2.207008453	0.027313469	0.267527394
Bend3	1177.153153	-0.377892637	0.142702237	-2.648119926	0.008094081	0.165978493
Lin28b	2085.657278	-0.369113211	0.15375926	-2.400591759	0.016368586	0.22577426
Vgll2	66.88035861	-0.41400506	0.189124287	-2.189063422	0.028592231	0.272604681
P4ha1	1844.835002	-0.345737169	0.100339548	-3.445671984	0.000569641	0.048233867
Cisd1	933.209613	-0.27879464	0.121920829	-2.286685899	0.022214163	0.249755593
Mif	15253.55341	-0.401569945	0.153515273	-2.615830578	0.008901071	0.172746005
Derl3	35.16929872	-0.426096087	0.209473175	-2.034131988	0.04193829	0.319887521
Pcbp3	659.8990972	-0.342989519	0.125529218	-2.732348095	0.006288466	0.143756698
Pfkl	6120.791564	-0.357507995	0.112385073	-3.181098558	0.001467177	0.074010309
C2cd4c	30.73781635	-0.507184045	0.248727659	-2.039113972	0.041438654	0.317959387
Shc2	830.8682273	-0.288639605	0.127678556	-2.260674112	0.023779445	0.255198185
Hcn2	22.10969617	-0.77520421	0.321842485	-2.408644745	0.016011876	0.22556154
Arid3a	1828.174612	-0.310264474	0.11291649	-2.747733949	0.006000868	0.141628837
Sf3a2	1989.719949	-0.472095272	0.172496543	-2.736839028	0.006203264	0.142995467
Amh	23.76410047	-0.719561779	0.342010325	-2.103918293	0.035385575	0.295637335
Tbxa2r	45.41699586	-0.558952784	0.213635974	-2.616379511	0.008886772	0.172746005
Hsp90b1	12336.05294	-0.315593069	0.095434642	-3.306902646	0.000943337	0.063082327
Ttc41	138.7534343	-0.444052208	0.172872327	-2.568671434	0.01020892	0.182391341
Usp44	146.7082316	-0.317837783	0.134278642	-2.367001773	0.017932847	0.231731548
Myf6	30.566315	-0.618316802	0.246092329	-2.512539926	0.011986554	0.1953127
Shmt2	2507.695048	-0.263348466	0.112954136	-2.331463688	0.019728923	0.23910519
Myo1a	69.42346501	-0.470337151	0.215211661	-2.185463131	0.028854906	0.272835347
Baz2a	2670.177721	-0.25614352	0.086576989	-2.958563505	0.003090766	0.104449868
Gdf11	1337.562526	-0.327584543	0.120619552	-2.715849435	0.006610597	0.1478811
Emid1	318.3852209	-0.366862042	0.116720986	-3.143068389	0.001671868	0.079536007
Xbp1	2169.767023	-0.394752797	0.163111978	-2.420133713	0.015514801	0.221178896
Ccdc117	1260.9833	-0.368736533	0.13102753	-2.814191288	0.004890012	0.130069634
Stc2	127.1936801	-0.476155094	0.161011949	-2.957265581	0.003103807	0.104449868
Mir218-2	22.68568132	-0.989266924	0.300024755	-3.297284334	0.000976246	0.063497949
Hspd1-ps3	197.9784009	-0.373651527	0.152448387	-2.451003481	0.014245858	0.213700697
Ccnjl	618.4754814	-0.373652248	0.141747993	-2.636032024	0.008388181	0.168685519
Gfpt2	434.6041887	-0.310277147	0.120527233	-2.574332282	0.010043377	0.182368882
Rasgef1c	29.95728091	-0.572428695	0.26043417	-2.197978453	0.027950641	0.269957152
Mgat4b	861.8485443	-0.273140579	0.127840116	-2.136579566	0.032632203	0.286581653
Tcf7	524.1192986	-0.455056437	0.150252921	-3.028602935	0.002456874	0.094261297
P4ha2	692.8301856	-0.254237167	0.116072173	-2.190336936	0.02849981	0.272335857
Obscn	263.948897	-0.414093214	0.203241584	-2.037443346	0.041605634	0.318224809
Gid4	1123.335102	-0.344406398	0.125063236	-2.753858044	0.005889731	0.139900011
Pigl	310.1995447	-0.294180636	0.08796739	-3.344201022	0.000825199	0.060001712
Lrrc75a	228.5466706	-0.262330739	0.133065291	-1.971443767	0.048673139	0.341489813
Myocd	102.148417	-0.536739486	0.223922279	-2.396990101	0.01653037	0.226215368
Arhgef15	387.4900044	-0.306522536	0.115419868	-2.655717265	0.007913994	0.164340306
Aurkb	2206.121915	-0.253917189	0.099757056	-2.545355674	0.010916648	0.187394956
Sox15	3.190322323	-1.573330737	0.78180001	-2.012446554	0.044172885	NA
Kctd11	174.4415021	-0.28724311	0.145168685	-1.978685073	0.047851475	0.338805457
Bcl6b	195.441852	-0.272692318	0.108348712	-2.516802587	0.011842516	0.194467197
Pelp1	1779.675933	-0.330877152	0.139500528	-2.371870247	0.017698305	0.230961657
Eno3	1530.028341	-0.306216984	0.13518218	-2.265217077	0.023499362	0.254578967
Camta2	512.1664825	-0.270707247	0.128595685	-2.105103661	0.035282286	0.295218763
Gsg2	405.0128444	-0.258724784	0.09917207	-2.608847257	0.009084778	0.173405425
Git1	2385.885511	-0.305121043	0.117173021	-2.604021311	0.009213703	0.17394259
Rhbdl3	541.3566933	-0.494739228	0.172346774	-2.87060336	0.004096892	0.121303465
Tmem132e	295.9637571	-0.45329631	0.176390559	-2.569844518	0.010174417	0.182391341
Fndc8	23.45127419	-0.780223432	0.278175236	-2.804791116	0.00503492	0.131414895
Unc45b	294.2030097	-0.42215037	0.181481101	-2.326139573	0.020011106	0.240848488
Igf2bp1	7185.904951	-0.27997732	0.132376863	-2.115001917	0.034429784	0.292785743
Hoxb9	991.1806727	-0.44711188	0.205461251	-2.176137242	0.029545	0.27592253
Hoxb8	579.0458676	-0.379736528	0.188205342	-2.01767136	0.0436255	0.326475592
Hoxb7	305.0263057	-0.347267641	0.135093476	-2.570573005	0.010153042	0.182391341
Hoxb5os	291.4851946	-0.416824746	0.15579556	-2.675459719	0.007462684	0.159718704
Hoxb4	639.020953	-0.395051527	0.123507561	-3.198601966	0.001380957	0.072997819
Hoxb1	130.6783958	-0.850197733	0.236599148	-3.593409958	0.000326378	0.038513375
E130012A19Rik	721.0632849	-0.588846385	0.206900535	-2.84603607	0.004426718	0.124930986
Cisd3	157.8332278	-0.441619048	0.209854232	-2.104408582	0.035342821	0.295576755
Ppp1r1b	5.038973791	-1.672771897	0.546205012	-3.062534872	0.002194709	0.089564111
Wipf2	920.4894292	-0.261804102	0.106954715	-2.447803267	0.014373011	0.214572452
Cdc6	1974.925318	-0.300599991	0.101180865	-2.970917394	0.002969116	0.102357672
Kat2a	1794.814434	-0.311389064	0.121599986	-2.560765629	0.010444179	0.183355497
Tubg1	1579.728736	-0.254933866	0.124216546	-2.0523342	0.040137194	0.314126765
Ramp2	471.0366857	-0.323969944	0.105979552	-3.056909935	0.002236315	0.089719806
Meox1	772.1877841	-0.516788488	0.154656092	-3.341533332	0.00083317	0.060317894
BC030867	483.5378029	-0.257739936	0.10090928	-2.554174761	0.010643982	0.184660469
C1ql1	62.92727475	-0.67304422	0.192498395	-3.496362753	0.000471647	0.044621563
Dcakd	4840.652111	-0.310486308	0.140015897	-2.217507553	0.026588428	0.265129896
Cygb	64.99093416	-0.384718301	0.164209452	-2.342851129	0.019137017	0.237945457
Mxra7	608.5732697	-0.261134266	0.117713472	-2.218388961	0.026528323	0.265129896
Jmjd6	1536.682827	-0.346637777	0.103288983	-3.355999508	0.000790787	0.058783017
Mafg	1570.609394	-0.258307702	0.100785651	-2.562941235	0.010378961	0.183137905
Hmga1-rs1	117.7134443	-0.603333552	0.184119941	-3.276850662	0.001049719	0.065710026
Rfng	554.4847935	-0.251119371	0.111862393	-2.244895396	0.024774849	0.260266234
Slc16a3	2115.339157	-0.631270181	0.148807688	-4.242187961	2.21E-05	0.010530624
BC068281	285.0122968	-0.265280138	0.125065359	-2.121132022	0.033910694	0.290905185
Matn3	104.6080376	-0.444497831	0.163555892	-2.717712133	0.0065735	0.147513951
Vsnl1	47.02565037	-0.392874117	0.192700906	-2.038776699	0.041472319	0.317959387
Mycn	2053.981957	-0.259384493	0.121846817	-2.128775281	0.033272857	0.288705754
Greb1	1869.740317	-0.4969231	0.113050284	-4.395593547	1.10E-05	0.006569442
Atp6v1c2	9.160679596	-0.900801086	0.418077048	-2.154629369	0.031190849	0.281411803
Hspa2	123.9476439	-0.307778255	0.136132088	-2.260879562	0.023766716	0.255198185
Galnt16	607.9175655	-0.252898218	0.123931361	-2.040631337	0.041287485	0.317688499
Slc10a1	9.277535239	-1.222036482	0.548132893	-2.229452927	0.025783784	0.264689142
2410016O06Rik	332.961664	-0.30535351	0.136954527	-2.229597777	0.025774158	0.264689142
Ahsa1	2923.697391	-0.339770764	0.114970923	-2.955275605	0.003123899	0.104449868
Gpr68	10.12506534	-0.904076902	0.425283592	-2.125821262	0.033518145	0.290156713
AK010878	147.3370939	-0.275296177	0.131206995	-2.098182177	0.035889055	0.29686471
Asb2	234.4451027	-0.512298625	0.255134557	-2.007954668	0.044648109	0.328737361
Tunar	17.09103128	-0.920528125	0.369536212	-2.491036315	0.01273711	0.201348342
Ccnk	1490.135257	-0.280989191	0.121326853	-2.315968678	0.020559979	0.244008702
Dlk1	4040.35899	-0.547198702	0.248247367	-2.204247758	0.027506925	0.268632143
Hsp90aa1	43504.50732	-0.269710772	0.134251972	-2.008989275	0.044538271	0.32858075
Trmt61a	574.2902855	-0.26079658	0.086587615	-3.011938595	0.002595851	0.096696902
Aspg	65.37313502	-0.646517066	0.228053727	-2.834933132	0.004583528	0.126144361
Mta1	3847.685178	-0.273550448	0.112116518	-2.439876401	0.014692288	0.216650513
Crip2	1132.093908	-0.437772029	0.150826624	-2.902485105	0.003702148	0.116059911
Ryr2	287.9313007	-0.551947068	0.171441673	-3.219445181	0.001284389	0.070727031
Ero1lb	124.2524924	-0.418639827	0.140875611	-2.971698387	0.002961575	0.102309502
Trim27	2444.095083	-0.289613653	0.112733545	-2.569010428	0.010198939	0.182391341
Zkscan3	3953.304874	-0.603494263	0.170144399	-3.546953455	0.000389713	0.040872755
Prl3b1	16.10341565	-1.272145804	0.412367719	-3.084979123	0.002035664	0.085812274
Bmp6	101.2486738	-0.370764119	0.188252208	-1.969507412	0.048894852	0.341506698
Sycp2l	10.91520393	-0.958565582	0.402340918	-2.38247103	0.017196885	0.228443428
Rbm24	239.5926977	-0.411899099	0.158376897	-2.600752429	0.009301956	0.175211383
Nfil3	277.8443502	-0.328166204	0.126639265	-2.591346403	0.009560121	0.177464403
Rnf44	4733.407292	-0.313970275	0.101842559	-3.082898531	0.00204995	0.086079525
Unc5a	181.1086336	-1.048139719	0.228801773	-4.580994744	4.63E-06	0.003470333
Hk3	60.96719901	-0.655176556	0.199839107	-3.27852023	0.001043529	0.065569052
Slc25a48	15.01503584	-0.729967077	0.339664592	-2.149082046	0.031627897	0.282618527
Cmya5	31.31774965	-0.646285309	0.271261662	-2.382516219	0.017194775	0.228443428
Nnt	1296.168582	-0.573556633	0.073214695	-7.833900467	4.73E-15	2.63E-11
Kcnk5	301.8252889	-0.277862724	0.131881861	-2.106906305	0.035125702	0.294913046
Synpo2l	287.3860849	-0.464157556	0.220194698	-2.107941564	0.035036044	0.294913046
Slc18a3	63.21832362	-1.085865657	0.442522246	-2.453810325	0.014135152	0.21223121
3425401B19Rik	35.27271896	-0.601116817	0.277900228	-2.16306702	0.030536025	0.279710819
Ldb3	301.9305089	-0.517870753	0.196756332	-2.632041101	0.008487359	0.169249129
2610528A11Rik	21.49620964	-1.356692571	0.47415242	-2.861300533	0.004219069	0.122389752
Rubie	8.80228693	-0.852573336	0.412459467	-2.067047564	0.038729672	0.309613147
4931414P19Rik	311.7504534	-0.269540978	0.117003917	-2.303691914	0.021239944	0.245686229
Myh6	3487.965169	-0.581961555	0.278718661	-2.087989203	0.036798809	0.300361256
Ap1g2	313.7507429	-0.319257494	0.111145289	-2.872433882	0.004073233	0.121303465
Cpne6	20.92581947	-0.783578187	0.311108652	-2.518664081	0.011780098	0.194313635
4931440J10Rik	1.064928589	-2.718251405	1.307013227	-2.079742844	0.037549126	NA
Defb42	8.490420595	-0.839383616	0.41023157	-2.046121453	0.040744423	0.316384865
Neil2	44.91339853	-0.481113911	0.23528442	-2.0448184	0.040872765	0.316596342
Blk	3.529140377	-1.5043879	0.643052005	-2.339449823	0.019312166	0.237945457
Xkr6	336.8423728	-0.311487674	0.126697736	-2.458510191	0.013951482	0.210309682
Nkx3-1	60.59508056	-0.964710542	0.307617038	-3.136076429	0.001712246	0.080766584
Loxl2	1372.576284	-0.307932852	0.099798478	-3.085546579	0.002031784	0.085812274
Tnfrsf10b	195.8702392	-0.272222004	0.109671942	-2.482148113	0.013059298	0.20368695
Mir17hg	1551.482445	-0.413750584	0.150745845	-2.744689806	0.006056812	0.141628837
Dnajc3	2055.39727	-0.392444234	0.11551521	-3.397338188	0.000680448	0.053953715
Pabpc1	20563.4967	-0.279609236	0.138852148	-2.01371919	0.044039024	0.327363299
Abra	16.99689967	-1.039765177	0.379956694	-2.736536016	0.00620898	0.142995467
Aard	103.8986483	-0.362562895	0.163311228	-2.220073287	0.026413793	0.265129896
Fbxo32	150.7163247	-0.465754546	0.171224879	-2.720133594	0.006525555	0.14703249
Trib1	597.3684078	-0.336502698	0.149556428	-2.250004921	0.024448633	0.259626395
Them6	60.28165418	-0.563783084	0.264281585	-2.133266626	0.03290286	0.287366808
2810039B14Rik	155.8296706	-0.480319281	0.127956632	-3.753766218	0.000174197	0.029697458
Top1mt	174.516574	-0.310797426	0.131983003	-2.354829165	0.018531223	0.233986206
Zc3h3	379.8828095	-0.266856552	0.130125506	-2.050762839	0.040290048	0.314206729
Naprt	72.28824933	-0.400728626	0.182482616	-2.195982473	0.028093198	0.270570247
Hsf1	1380.930781	-0.326300289	0.087806829	-3.716115143	0.000202309	0.030651981
Cdc42ep1	458.1832469	-0.500246205	0.168967702	-2.960602515	0.003070379	0.104336498
Nptxr	130.8958198	-0.482945606	0.189072762	-2.554284398	0.010640631	0.184660469
Tob2	557.9759019	-0.268111519	0.125040401	-2.144199139	0.032016934	0.284402698
Desi1	789.2759553	-0.274237775	0.112929862	-2.428390239	0.015166015	0.219019353
Ccdc134	458.0309886	-0.259618257	0.112007234	-2.317870439	0.020456363	0.243505871
Parvb	1316.583667	-0.381667072	0.161842734	-2.358258919	0.018360882	0.233187707
Gtse1	1188.708231	-0.294973184	0.093137843	-3.16706049	0.001539883	0.075452673
Fam19a5	347.046814	-0.251609607	0.116851687	-2.153238983	0.031299901	0.281411803
Creld2	1247.490606	-0.52357472	0.138961496	-3.767768317	0.000164713	0.029697458
Mapk12	786.7803695	-0.320794207	0.103017977	-3.113963378	0.001845924	0.082713914
Wnt1	148.8941113	-0.561576603	0.22000974	-2.552507915	0.010695048	0.184925487
Nckap5l	820.2232099	-0.253564876	0.120914236	-2.097063883	0.035987921	0.297212366
Fignl2	2091.257145	-0.765913711	0.240748917	-3.181379667	0.001465754	0.074010309
Krt78	1.099293522	-2.867317628	1.45629496	-1.968912691	0.048963118	NA
Zfp385a	1151.525482	-0.418349796	0.177283852	-2.359773844	0.018286079	0.232905359
Naa60	565.7684472	-0.281246865	0.09242398	-3.043007496	0.002342265	0.092628505
Glis2	1455.48856	-0.349595117	0.09776409	-3.575905191	0.000349018	0.039264908
Litaf	1004.773753	-0.295486597	0.12606738	-2.343878313	0.019084397	0.237783373
2610318N02Rik	1864.673924	-0.317864356	0.096090409	-3.307971735	0.000939743	0.063082327
Sdf2l1	834.2936786	-0.783754326	0.206406952	-3.797131441	0.00014638	0.028675017
Igf2bp2	5514.970007	-0.321585122	0.115698125	-2.779518882	0.005443949	0.135827101
Etv5	998.7760184	-0.297555109	0.129755912	-2.293191156	0.021837002	0.248874769
Dnajb11	1618.007192	-0.37312736	0.120479117	-3.097029344	0.001954705	0.084608867
P3h2	197.0829129	-0.46976137	0.156872548	-2.99454159	0.002748576	0.098756412
Pdia5	462.399199	-0.318554389	0.127210654	-2.504148657	0.012274645	0.197664518
Fbxo40	27.08664447	-0.611914588	0.296387062	-2.064579284	0.038962825	0.310426671
Popdc2	218.3142021	-0.456630105	0.194832038	-2.343711581	0.01909293	0.237783373
Map3k7cl	10.3888621	-0.985398852	0.454493073	-2.168127326	0.030149	0.278050335
Tmem50b	596.8021305	-0.33078512	0.092095357	-3.591767594	0.000328443	0.038513375
Ppp1r2-ps6	2.330308147	-2.120046002	0.900528916	-2.354223129	0.018561466	NA
Prr18	25.6808019	-0.649492736	0.252466497	-2.572589805	0.010094076	0.182391341
Atp6v0c	301.8945427	-0.290834235	0.126564739	-2.297908865	0.021566977	0.247663261
Ccnf	2484.345832	-0.254492557	0.106707657	-2.38495122	0.017081386	0.227719904
Snora78	2.106795952	-2.54497846	1.086977802	-2.341334345	0.019214951	NA
Sox8	196.3215952	-0.411860104	0.158238635	-2.602778422	0.00924717	0.174376696
Metrn	239.8522344	-0.41926149	0.157472935	-2.662435226	0.00775775	0.162279263
Rhot2	727.2311945	-0.262856083	0.08420515	-3.121615264	0.001798618	0.081597647
Wfikkn1	153.3856742	-1.481300237	0.406702641	-3.642219369	0.000270298	0.036005799
Nkx2-5	114.5434557	-0.661607505	0.268985228	-2.459642528	0.013907546	0.210309682
Hmga1	11584.09667	-0.405608987	0.150360939	-2.69756886	0.006984784	0.152830005
Ppard	525.158303	-0.312285515	0.148631458	-2.101072801	0.035634576	0.296176132
Wdr46	1270.851008	-0.250015413	0.1193576	-2.094675277	0.036199868	0.297212366
H2-K2	9.795401344	-1.152822352	0.449175466	-2.566530094	0.010272171	0.182995053
Col11a2	237.567048	-0.401155014	0.175492968	-2.285875146	0.022261564	0.249891488
H2-Ab1	54.53079929	-0.541714645	0.21420147	-2.528995921	0.011438936	0.192808522
Notch4	384.1208126	-0.317644312	0.133887911	-2.372464464	0.017669863	0.230961657
Agpat1	1857.06631	-0.380743152	0.123017812	-3.09502457	0.001967966	0.084673387
Egfl8	32.2623582	-0.621719662	0.263281953	-2.361421487	0.018205026	0.232905359
Hspa1b	82.47089328	-1.333544287	0.334157779	-3.990762366	6.59E-05	0.021089531
Lsm2	1649.246505	-0.318035204	0.108884957	-2.920836929	0.003490925	0.112649984
Vars	5924.482651	-0.291567039	0.128444516	-2.269984324	0.023208534	0.253433772
Mir8094	9.452275641	-1.124182552	0.440207889	-2.55375376	0.010656859	0.184660469
H2-Q6	51.66076775	-0.510155441	0.173125602	-2.94673598	0.003211473	0.105896861
Psors1c2	11.50599172	-0.857720365	0.428378917	-2.002246914	0.045258182	0.330077575
Mdc1	3364.584324	-0.259282539	0.097137159	-2.669241546	0.007602276	0.161644995
Hsp90ab1	72493.70325	-0.324441013	0.121773617	-2.664296437	0.007714954	0.162279263
Tjap1	1573.336585	-0.328738132	0.100860016	-3.259350395	0.001116677	0.066553243
Slc22a7	2.142004897	-1.900608928	0.965197604	-1.969139707	0.04893705	NA
Guca1b	27.44497509	-0.922957514	0.272694363	-3.384585966	0.000712857	0.055989532
Dpp9	1736.865758	-0.255866756	0.106304685	-2.406918917	0.016087741	0.22577426
Safb	5816.65089	-0.279733559	0.096193687	-2.908024094	0.003637203	0.114860874
Khsrp	5532.847809	-0.26746746	0.112742794	-2.37236856	0.01767445	0.230961657
Tnfsf9	84.02089062	-0.526295683	0.157653901	-3.33829789	0.000842933	0.060760528
Trip10	724.7519978	-0.420198852	0.119462219	-3.517420441	0.000435763	0.0426817
Greb1l	905.4162423	-0.347513894	0.155754636	-2.231162446	0.025670371	0.264364524
Cables1	154.6215411	-0.302115351	0.119068137	-2.537331631	0.011170108	0.189402724
Mzb1	6.652008659	-1.602446764	0.476814668	-3.360732945	0.000777359	0.058569288
Psd2	396.1646422	-0.383571451	0.122624901	-3.12800621	0.001759965	0.081597647
Hbegf	95.93930921	-0.334037839	0.129053393	-2.588369288	0.009643154	0.178607512
Eno1b	83.88981682	-0.515460583	0.218146867	-2.362906196	0.018132259	0.232905359
Arsi	50.31448087	-0.370502303	0.181044785	-2.046467693	0.040710378	0.316317547
Camk2a	311.6686393	-0.380547788	0.119231564	-3.19166986	0.001414529	0.07375281
Cdx1	19.83094558	-1.269811638	0.463565653	-2.739227184	0.00615838	0.142277334
Alpk2	114.3221976	-0.489641893	0.219407312	-2.231657135	0.025637632	0.264364524
B430212C06Rik	12.60165215	-0.712005677	0.339886235	-2.094835284	0.036185637	0.297212366
Scarna17	4.926369706	-1.686501163	0.607371259	-2.776722043	0.005491011	0.135920873
Dym	576.2537153	-0.310924585	0.125338817	-2.480672726	0.013113471	0.20368695
1810055G02Rik	596.7015165	-0.25435897	0.106576153	-2.386640573	0.017003106	0.227719904
Cdk2ap2	315.6851354	-0.383045652	0.141962239	-2.698222118	0.006971091	0.152731101
Rbm14	1640.658767	-0.26362453	0.107332186	-2.456155406	0.014043241	0.211143663
Slc29a2	329.3365388	-0.294590965	0.110547781	-2.664829284	0.007702741	0.162279263
Sipa1	1430.125805	-0.284819419	0.101694606	-2.800732794	0.005098672	0.131599895
Sssca1	311.9081233	-0.25746084	0.120270626	-2.140679296	0.032299909	0.284865355
Syvn1	1517.60678	-0.481651322	0.151064118	-3.188390005	0.001430674	0.07375281
Sf1	4991.523596	-0.279714042	0.127447586	-2.194737861	0.028182407	0.271251596
Fkbp2	663.520687	-0.315803833	0.137775649	-2.292160013	0.021896411	0.248874769
Vegfb	562.5653508	-0.349120043	0.12671033	-2.755261093	0.005864532	0.139500451
Stip1	9108.006974	-0.350533454	0.108638379	-3.226607914	0.00125267	0.069527352
Rcor2	3875.297345	-0.268621774	0.091100612	-2.948627529	0.003191884	0.105796246
Lbhd1	329.3076196	-0.308315484	0.111579428	-2.763192909	0.005723893	0.138128312
Ints5	1332.867304	-0.317882406	0.125648884	-2.529926219	0.011408651	0.192808522
Ccdc86	593.7173155	-0.379997868	0.144056518	-2.637838774	0.008343624	0.168251006
Fam189a2	110.2746211	-0.377881037	0.165901847	-2.277738583	0.022742157	0.251288111
Cyp26c1	294.7937663	-0.619952336	0.213578442	-2.902691531	0.003699709	0.116059911
Cyp26a1	317.5905661	-0.384875756	0.169865331	-2.265769909	0.023465475	0.254504157
Slc35g1	298.2185764	-0.261768641	0.129141937	-2.02698401	0.042664048	0.322176446
Slit1	655.3587203	-0.406872268	0.188791439	-2.155141512	0.031150762	0.281411803
Pgam1	6019.556834	-0.347926474	0.115320514	-3.017038879	0.002552571	0.096160305
Sfrp5	65.3121784	-0.568848391	0.255012682	-2.23066707	0.02570319	0.264514107
Pprc1	2325.199901	-0.3243112	0.087384149	-3.711327541	0.000206175	0.030651981
Dusp5	167.6628746	-0.349444095	0.17405421	-2.007673897	0.044677956	0.328737361
Nutf2-ps1	37.02157274	-0.474738969	0.207383929	-2.289179162	0.022068945	0.249205291
Rbm20	129.4826313	-0.324011736	0.152948777	-2.118433	0.034138414	0.291507038
Nudt10	245.6378563	-0.295193596	0.148403807	-1.989124147	0.046687502	0.334506708
Cfp	331.838331	-0.345123064	0.173417918	-1.990123441	0.046577339	0.334148761
Arhgap36	120.7895047	-0.758533989	0.261483411	-2.900887624	0.003721073	0.116059911
Ccdc160	114.5100117	-0.447271034	0.191139357	-2.340025835	0.019282406	0.237945457
Gpr50	244.0796092	-0.402755137	0.197404041	-2.040257812	0.041324654	0.317815514
Dusp9	2579.117874	-0.54625292	0.197199504	-2.770052202	0.005604731	0.136954833
Eif2s3x	5233.904227	-0.357326698	0.16668986	-2.143661882	0.032059989	0.284402698
Gspt2	342.056961	-0.270319513	0.087763957	-3.080074365	0.002069489	0.08614766
Eda2r	99.92770315	-0.456287631	0.177018199	-2.577631192	0.009948011	0.181528213
Tmem28	91.31080408	-0.683975805	0.262485944	-2.605761646	0.009167023	0.173651989
Slc7a3	58.79984156	-0.390573614	0.19046864	-2.050592754	0.040306623	0.314206729
Fgd1	779.6224585	-0.269295168	0.13417284	-2.007076607	0.044741507	0.329059553
Kdm5c	4100.748598	-0.370796852	0.143178972	-2.589743778	0.009604739	0.178094109
