# Supplementary material for: SORBS2 is a genetic factor contributing to cardiac malformation of 4q deletion syndrome patients
Source: eLife. 2021 Jun 8;10:e67481. doi: 10.7554/eLife.67481 (PMC8186900; doi:10.7554/eLife.67481)
Supplement: Supplementary file 5. [file elife-67481-supp5.csv]

X	baseMean	log2FoldChange	lfcSE	stat	pvalue	padj
Fut10	412.9321732	-1.466500442	0.123111125	-11.91200588	1.02E-32	1.67E-28
Nnt	1296.169	-0.6783481	0.06072565	-11.1707	5.67E-29	3.08E-25
Sorbs2	400.6694894	-1.320030198	0.134355347	-9.824917497	8.79E-23	3.58E-19
Saraf	1382.846063	-0.519700938	0.059162561	-8.78428741	1.57E-18	5.13E-15
Fgl1	4.13056939	-5.267462864	0.694795639	-7.581312504	3.42E-14	NA
Dctd	1270.146056	-0.444360491	0.062601957	-7.09818845	1.26E-12	2.58E-09
Asah1	1286.688338	-0.409616359	0.066722962	-6.139061419	8.30E-10	1.23E-06
Slc7a2	256.8724005	-0.548430354	0.093399161	-5.871898063	4.31E-09	5.85E-06
Hsph1	5886.367556	-0.694542581	0.123118183	-5.641267285	1.69E-08	2.12E-05
6430573F11Rik	135.9082278	-0.508712996	0.103768783	-4.902370286	9.47E-07	0.000857602
1700029J07Rik	68.5196013	-0.815725564	0.1690425	-4.825564956	1.40E-06	0.001083815
Sdf2l1	834.2937	-0.8184142	0.1715473	-4.770778	1.84E-06	0.001300806
Hyou1	4379.678446	-0.498372181	0.110471919	-4.511301921	6.44E-06	0.00437674
Mlec	9606.502562	-0.259449551	0.058315262	-4.449084928	8.62E-06	0.005207113
AV026068	180.0431676	-0.595952014	0.135979761	-4.382652311	1.17E-05	0.006371383
Zkscan3	3953.305	-0.6079666	0.1415274	-4.295752	1.74E-05	0.008348195
Hspa1b	82.47089	-1.155169	0.2751039	-4.19903	2.68E-05	0.0109255
Vsnl1	47.02565	-0.6697516	0.1606219	-4.169739	3.05E-05	0.01183707
Trmt1l	915.1029244	-0.3047795	0.074061525	-4.115220447	3.87E-05	0.014181118
Hsf1	1380.931	-0.2936889	0.07291539	-4.027804	5.63E-05	0.01835728
Ubfd1	3817.582303	-0.25738582	0.065347758	-3.938709296	8.19E-05	0.023849285
Unc5a	181.1086	-0.7381671	0.1884639	-3.916756	8.97E-05	0.02451998
Calr	16410.65932	-0.370672701	0.095517519	-3.880677669	0.000104166	0.025730535
Trip10	724.752	-0.3843281	0.09913969	-3.876632	0.000105912	0.02577149
Vgll2	66.88036	-0.5996987	0.1569509	-3.820932	0.000132949	0.02860885
Creld2	1247.491	-0.4399051	0.1154425	-3.810598	0.000138631	0.02860885
Hoxb4	639.021	-0.3899109	0.1025263	-3.803033	0.000142935	0.02876879
Rbm24	239.5927	-0.4981196	0.131446	-3.789539	0.000150927	0.03000692
Tmem50b	596.8021	-0.2886752	0.07629092	-3.783874	0.000154406	0.03032868
Sox8	196.3216	-0.4945248	0.131248	-3.767865	0.00016465	0.03195579
Ero1lb	124.2525	-0.4356893	0.1161613	-3.750727	0.000176323	0.03381867
Gspt2	342.057	-0.2716063	0.07261177	-3.740527	0.000183635	0.03427388
Rassf5	95.03249314	-0.404523416	0.108518161	-3.727702465	0.000193233	0.034618491
Stip1	9108.007	-0.3359617	0.09037514	-3.717413	0.000201274	0.03499793
5930422O12Rik	6.309518038	-1.547652835	0.417552011	-3.706491152	0.000210151	0.034997932
Glis2	1455.489	-0.3009635	0.08120503	-3.706217	0.000210378	0.03499793
Bend4	896.500249	-0.364311158	0.098598268	-3.694904233	0.00021997	0.035369742
Coro2a	152.2351454	-0.368778398	0.09996233	-3.689173711	0.000224984	0.035610749
Kdm5c	4100.749	-0.4383027	0.1191117	-3.679763	0.000233451	0.03616006
Nptx2	70.5817448	-0.538316251	0.147104894	-3.659404097	0.000252802	0.037130072
C1ql1	62.92727	-0.5709563	0.1568116	-3.641033	0.000271546	0.03816389
Nkx2-5	114.5435	-0.8107364	0.2232149	-3.63209	0.000281135	0.03822071
4931414P19Rik	311.7505	-0.3517538	0.09718051	-3.619593	0.000295067	0.03822071
Hoxb1	130.6784	-0.706117	0.1951544	-3.618249	0.000296604	0.03822071
Zfat	268.5725	-0.3389231	0.09367526	-3.618064	0.000296815	0.03822071
Dlc1	1261.979915	-0.303692704	0.084037212	-3.613788425	0.000301755	0.038220715
Hspa8	83927.61308	-0.441617009	0.122323322	-3.610243758	0.000305909	0.038220715
Zbtb40	634.3444707	-0.418890249	0.11611983	-3.607396336	0.000309285	0.038220715
Cnot3	2175.732464	-0.273272204	0.075846482	-3.602964772	0.000314608	0.038220715
Hspa2	123.9476	-0.4064275	0.1128523	-3.601412	0.000316494	0.03822071
Unc45b	294.203	-0.5407485	0.1508048	-3.585751	0.00033611	0.03970724
Manf	1703.985389	-0.487223654	0.137810507	-3.535460863	0.000407065	0.04524788
C130036L24Rik	89.45466565	-0.488248958	0.138874684	-3.515752067	0.00043851	0.045859159
Ryr2	287.9313	-0.499224	0.1420359	-3.514773	0.00044013	0.04585916
Pprc1	2325.2	-0.2545823	0.07260873	-3.506222	0.000454516	0.04585916
Impdh1	789.9984646	-0.286147008	0.08169221	-3.502745326	0.00046049	0.045859159
Acta1	476.8259302	-0.596857787	0.170466123	-3.501327869	0.000462946	0.045859159
Greb1	1869.74	-0.3286489	0.09388916	-3.500393	0.000464573	0.04585916
Des	986.0642352	-0.509948476	0.14568685	-3.500305456	0.000464725	0.045859159
Syvn1	1517.607	-0.4369826	0.1255793	-3.479734	0.000501912	0.04585916
Gbx1	70.85555257	-0.542115252	0.155878392	-3.477808851	0.00050553	0.045859159
Slc16a3	2115.339	-0.4298812	0.1236674	-3.476107	0.000508749	0.04585916
Mdc1	3364.584	-0.2803759	0.08079202	-3.470342	0.000519797	0.04585916
Lpar3	59.62197246	-0.632645798	0.182319382	-3.469986518	0.000520484	0.045859159
Myocd	102.1484	-0.6434674	0.18559	-3.467145	0.000526018	0.04585916
Fam65a	756.7843977	-0.283263957	0.08175339	-3.464858834	0.00053051	0.0460048
Smyd1	583.9351389	-0.387312608	0.111987663	-3.45852926	0.000543133	0.046781606
Lman2l	1015.131209	-0.293748447	0.085136434	-3.450325958	0.00055991	0.04723599
1700017B05Rik	656.2158735	-0.422242158	0.122485716	-3.447276727	0.000566268	0.04723599
Crip2	1132.094	-0.431479	0.125373	-3.441563	0.000578363	0.04728373
Sfrp5	65.31218	-0.7257481	0.2113491	-3.433883	0.000595	0.04755041
Exoc3l2	154.0215303	-0.534630702	0.155757046	-3.432465602	0.00059812	0.047566567
Setd8	2379.694195	-0.302511549	0.088328276	-3.424855144	0.000615127	0.048213559
Hspa5	21454.21788	-0.343508696	0.101018537	-3.400452097	0.000672745	0.051207187
Jak3	154.1081043	-0.344730066	0.101716114	-3.389139177	0.000701124	0.051956486
Rrad	156.3310263	-0.495524868	0.146693546	-3.377959577	0.000730258	0.053870582
Mical2	425.8250079	-0.477134307	0.141534552	-3.371150723	0.000748549	0.054724632
Helz	1494.924	-0.3174212	0.09441553	-3.36196	0.000773913	0.05607601
Atp2a2	6863.528529	-0.348207768	0.103744621	-3.356393476	0.000789661	0.056712991
Pml	782.2526436	-0.326708191	0.09748788	-3.351269842	0.000804419	0.057095799
Ubqln4	3233.047955	-0.26753973	0.079940184	-3.346748995	0.000817652	0.05752969
Hsp90b1	12336.05	-0.2651114	0.07939093	-3.339316	0.00083985	0.05752969
Actc1	6919.191396	-0.44170947	0.1323853	-3.336544703	0.000848268	0.057674238
Klhl30	59.07150129	-0.651020755	0.195255678	-3.334196274	0.000855463	0.057702218
Isyna1	3045.220306	-0.274054947	0.08220372	-3.333850896	0.000856526	0.057702218
Camk2a	311.6686	-0.3276801	0.09861785	-3.322726	0.000891426	0.05883771
Pdia4	6331.946974	-0.271180805	0.081959867	-3.308702347	0.000937294	0.059986645
Dnaja1	11385.11085	-0.272692424	0.082451294	-3.307315265	0.000941948	0.059986645
Hoxb5os	291.4852	-0.4267222	0.1292177	-3.30235	0.000958784	0.06035154
BC030867	483.5378	-0.2758883	0.0837488	-3.294235	0.000986898	0.06123312
Cdk2ap2	315.6851	-0.3872934	0.1177285	-3.289717	0.001002881	0.06169802
Creb3l2	1339.328316	-0.300278414	0.091629415	-3.277096281	0.001048806	0.062855736
Zfp142	843.4645944	-0.323918454	0.09957057	-3.253154571	0.001141314	0.065981707
Fam174b	277.0991214	-0.341673943	0.105359774	-3.242925932	0.00118309	0.067564097
Tmem140	69.21391312	-0.468358069	0.144979966	-3.230501981	0.00123573	0.068563809
Bag3	425.2287782	-0.565494712	0.17543663	-3.223355993	0.00126698	0.069082183
Cdt1	1770.468311	-0.282867735	0.087806939	-3.221473577	0.001275332	0.069305804
Eng	651.2249563	-0.45535857	0.141592634	-3.215976412	0.001300015	0.069814451
Nos3	123.4311539	-0.394663829	0.122953622	-3.209859313	0.001328	0.070374947
Repin1	842.3121315	-0.318403814	0.09921002	-3.20939169	0.001330162	0.070374947
Gdf11	1337.563	-0.3216176	0.1002653	-3.207665	0.001338173	0.07037495
Dnajb11	1618.007	-0.3205196	0.1001353	-3.200866	0.001370154	0.07088246
Ung	869.5525444	-0.265762014	0.083052742	-3.199918608	0.001374664	0.070882461
Mta1	3847.685	-0.2983739	0.09326213	-3.199304	0.0013776	0.07088246
Fam183b	26.58232	-0.6092477	0.1904647	-3.198744	0.001380278	0.07088246
Ocel1	445.8399424	-0.435777374	0.136658533	-3.18880472	0.001428624	0.071444322
Tns2	583.8737	-0.2611217	0.08258533	-3.161841	0.00156775	0.07524906
Samd1	1115.497419	-0.292264123	0.09253682	-3.158354939	0.001586623	0.075249057
Wipf2	920.4894	-0.2790415	0.08888429	-3.139379	0.001693062	0.07688576
Sf1	4991.524	-0.3317248	0.1060289	-3.128626	0.001756257	0.07817388
Loxl2	1372.576	-0.2591906	0.08290765	-3.126256	0.001770473	0.07822228
Arid3b	1314.119167	-0.295522876	0.094714977	-3.120128254	0.001807723	0.079418245
Sf3a2	1989.72	-0.4475918	0.143456	-3.120063	0.001808121	0.07941825
Rnf44	4733.407	-0.2632602	0.08470042	-3.108133	0.001882732	0.08207001
Ints3	2902.790422	-0.262643069	0.084603496	-3.104399731	0.001906655	0.08259771
Zak	460.1595202	-0.253339881	0.081620505	-3.103875448	0.001910037	0.08259771
Rnpep	922.1352775	-0.281326284	0.09097296	-3.092416503	0.001985341	0.0839008
Cap2	465.5398	-0.2786709	0.09047596	-3.080054	0.002069628	0.08651575
Pcbp3	659.8991	-0.3191359	0.1042333	-3.061745	0.002200511	0.09037628
Gyg	1406.258058	-0.377114322	0.123315085	-3.058136176	0.002227183	0.090774428
Snai1	694.4312522	-0.365956803	0.119958625	-3.050691872	0.002283147	0.09101766
Xirp1	123.6522562	-0.657518147	0.21558815	-3.049880738	0.002289323	0.09101766
Klhl21	290.9641434	-0.406661764	0.134280934	-3.028440081	0.002458198	0.094296483
Rbm14	1640.659	-0.2701935	0.08924094	-3.027685	0.002464345	0.09431037
Hsp90ab1	72493.7	-0.3062408	0.1013199	-3.022512	0.002506858	0.09508903
Sympk	5029.828538	-0.287710079	0.095225647	-3.021350736	0.002516497	0.095089028
Peli3	82.52511	-0.4411046	0.1461121	-3.018947	0.002536547	0.09508903
Trib1	597.3684	-0.3742285	0.1242965	-3.010772	0.002605843	0.09677233
Jmjd6	1536.683	-0.2581417	0.08579827	-3.008705	0.002623635	0.09705682
Ppp1r14c	103.4112448	-0.369405279	0.122830231	-3.007445928	0.00263453	0.097056822
Nat8l	288.68865	-0.475107031	0.158282214	-3.0016451	0.00268525	0.097392252
Lsm2	1649.247	-0.27145	0.09049697	-2.999548	0.002703803	0.09739225
Sipa1	1430.126	-0.2534518	0.08450989	-2.999079	0.002707975	0.09739225
Bend3	1177.153	-0.3550559	0.1186207	-2.993203	0.002760661	0.0984837
Kcna5	93.27124991	-0.431873899	0.144427914	-2.990238436	0.002787598	0.098969128
2810039B14Rik	155.8297	-0.3124887	0.1046379	-2.986382	0.002823001	0.09896913
Stc2	127.1937	-0.3958647	0.1325576	-2.98636	0.002823201	0.09896913
Btbd2	1577.495	-0.2712422	0.09086305	-2.985176	0.002834149	0.09896913
Popdc2	218.3142	-0.4821285	0.1616548	-2.982457	0.002859451	0.09918645
Dpp9	1736.866	-0.2634128	0.0883915	-2.98007	0.002881827	0.09932859
Ldb3	301.9305	-0.4842771	0.1632572	-2.966345	0.003013626	0.10145
Cbx2	3481.347	-0.2504028	0.08445518	-2.96492	0.00302762	0.1015623
Irs3	7.79270192	-0.957450852	0.323222915	-2.962199797	0.003054495	0.101760439
Mtss1l	1634.797323	-0.319188186	0.10775973	-2.962035863	0.003056122	0.101760439
Rbpms2	559.2210814	-0.377630858	0.127500586	-2.961797037	0.003058493	0.101760439
Dedd2	350.7908178	-0.378784659	0.128277743	-2.952847869	0.003148571	0.103281995
Map1s	1367.210694	-0.254305811	0.086194596	-2.950368369	0.003173953	0.103697292
Ubap2	3823.469272	-0.314211874	0.106887792	-2.939642294	0.003285914	0.105385635
Klhl29	462.8616	-0.2548919	0.08681838	-2.93592	0.003325596	0.1053856
Dhx37	1024.67023	-0.298054446	0.101567847	-2.934535426	0.003340474	0.10541676
Tmod1	227.1606041	-0.391504491	0.133508085	-2.932440315	0.003363096	0.10541676
Wfikkn1	153.3857	-0.986229	0.3363952	-2.931757	0.003370499	0.1054168
H2-Q6	51.66077	-0.4110042	0.1404049	-2.927277	0.003419441	0.1063776
Creld1	469.2414835	-0.374588225	0.127989371	-2.926713552	0.003425642	0.106377613
Plcg2	240.5253788	-0.529864225	0.181857006	-2.913631089	0.003572518	0.108057073
Igf2bp2	5514.97	-0.2798833	0.09623864	-2.908221	0.003634909	0.1086152
Thop1	2518.163	-0.2513786	0.08653086	-2.905074	0.003671661	0.1088339
Trim71	1065.214521	-0.384891714	0.132521018	-2.904382404	0.003679784	0.108833916
Trim55	243.5531107	-0.417043816	0.143779554	-2.900578025	0.003724751	0.109220785
Dnajc3	2055.397	-0.2784557	0.09600045	-2.900567	0.003724882	0.1092208
Tnnt2	1878.096848	-0.405399491	0.139815294	-2.899536084	0.003737153	0.109232142
Pelp1	1779.676	-0.3355576	0.1160116	-2.892449	0.003822513	0.1103939
Ccnjl	618.4755	-0.339359	0.1177136	-2.88292	0.003940073	0.1111013
Prtg	1601.598902	-0.436817582	0.151531908	-2.882677242	0.003943112	0.111101308
Uhrf1	8601.323	-0.2602469	0.0906563	-2.870699	0.004095654	0.1124468
Plk1	2505.065404	-0.305441629	0.106413088	-2.870338941	0.00410032	0.112446758
Hk2	1572.558824	-0.311340558	0.108738239	-2.863211337	0.004193707	0.114140254
Sigmar1	1010.574482	-0.273940834	0.095876626	-2.857222304	0.004273664	0.115353552
Alpk3	184.7428359	-0.409233063	0.14359252	-2.849960872	0.004372461	0.116477497
Sac3d1	764.2922	-0.2768108	0.09724052	-2.846661	0.004418043	0.1173084
Tob2	557.9759	-0.2955087	0.1038943	-2.844321	0.004450618	0.1176004
Foxd2os	297.6273017	-0.255730288	0.089958442	-2.842760321	0.004472469	0.117600377
AI506816	2794.380964	-0.28550614	0.100492924	-2.841057149	0.004496425	0.117600377
Pfkl	6120.792	-0.2655426	0.09347582	-2.840762	0.004500585	0.1176004
Tmem215	5.56957779	-1.234678492	0.43471211	-2.840221066	0.004508228	0.117600377
Rasip1	164.7751116	-0.394085285	0.138847849	-2.838252717	0.004536125	0.117600377
Radil	136.2597635	-0.319907364	0.112733366	-2.837734502	0.004543496	0.117600377
Zdhhc18	648.0425918	-0.270341053	0.095349222	-2.835272759	0.004578658	0.11792394
Gata4	370.8198	-0.5147262	0.1816125	-2.8342	0.004594064	0.1179481
Pelo	501.461	-0.2864936	0.1012563	-2.82939	0.004663677	0.1190765
Rtbdn	41.34303128	-0.440563547	0.155957578	-2.824893494	0.004729633	0.119661238
Zbtb45	505.2417738	-0.344670136	0.122025056	-2.824584934	0.00473419	0.119661238
Dnajb1	2052.420343	-0.391178147	0.139018152	-2.813863808	0.004894996	0.121493836
Vegfb	562.5654	-0.2956891	0.1051454	-2.812193	0.004920503	0.1217114
Khsrp	5532.848	-0.2635068	0.09378787	-2.809604	0.004960248	0.1221555
Pkn3	455.5527052	-0.296600288	0.105747961	-2.804784923	0.005035016	0.122883044
Raver1	2614.504303	-0.297917218	0.106559704	-2.795777446	0.005177504	0.125077595
Kcnh2	809.045011	-0.289947421	0.103718312	-2.795527775	0.005181505	0.125077595
Tlr12	19.36493383	-0.690412131	0.247439719	-2.79022355	0.005267166	0.125709948
Nelfa	1321.388294	-0.253848976	0.091120056	-2.785873806	0.005338365	0.126456395
Ahsa1	2923.697	-0.2660715	0.0955984	-2.783221	0.00538221	0.1268008
Asb2	234.4451	-0.5895795	0.2119881	-2.781191	0.005415989	0.1270459
Mybphl	34.54327637	-0.558721272	0.20100185	-2.779682239	0.005441211	0.127102664
Ccdc86	593.7173	-0.3324821	0.119613	-2.779647	0.0054418	0.1271027
Dcakd	4840.652	-0.3234786	0.1164808	-2.777099	0.005484651	0.1274992
Zfp703	852.2647814	-0.292303289	0.105362155	-2.774272122	0.005532538	0.127938958
4930558J18Rik	61.90612043	-0.350818403	0.127056833	-2.761114014	0.005760456	0.130715769
Rbm20	129.4826	-0.3487522	0.1265916	-2.75494	0.005870294	0.1308381
Tnni1	1578.903647	-0.373069661	0.135436597	-2.754570545	0.005876922	0.13083809
Zcchc3	2054.196819	-0.282050428	0.102393687	-2.754568543	0.005876958	0.13083809
Zbtb16	570.1313483	-0.398536659	0.14491958	-2.75005393	0.005958546	0.131925137
Dlk1	4040.359	-0.5677969	0.2065305	-2.749215	0.00597381	0.1319251
Nr4a2	222.6866989	-0.300343406	0.109386054	-2.745719345	0.006037839	0.131925137
Flnc	1886.767885	-0.28531945	0.103928553	-2.745342266	0.006044782	0.131925137
Sepn1	1625.286593	-0.251075583	0.091619949	-2.740403003	0.006136389	0.132611834
E030030I06Rik	83.31605	-0.3239638	0.1183553	-2.737214	0.006196194	0.1334433
Slc26a9	5.255662142	-1.387578486	0.507295972	-2.735244437	0.006233397	0.134067373
Fam129c	115.0158259	-0.38617632	0.141225547	-2.734465044	0.006248173	0.134072585
C330021F23Rik	65.11362291	-0.420949177	0.15399667	-2.73349532	0.006266601	0.134072585
1110032F04Rik	51.76150705	-0.396449587	0.145076034	-2.732702123	0.006281712	0.134072585
Vars	5924.483	-0.2919495	0.1068549	-2.732205	0.006291206	0.1340726
Nfil3	277.8444	-0.2856227	0.1048459	-2.724214	0.006445479	0.1357853
Etv5	998.776	-0.2934418	0.1078562	-2.720676	0.006514852	0.1358921
Eif2s3x	5233.904	-0.3765294	0.1386771	-2.715152	0.006624544	0.1359571
Pgam1	6019.557	-0.2600126	0.09591972	-2.710731	0.006713508	0.1361497
Syt3	27.42574003	-0.51112927	0.188712022	-2.708514623	0.006758513	0.136267353
Pgam2	242.8704	-0.3963174	0.1463717	-2.707609	0.00677698	0.1363964
Sfxn5	219.0994309	-0.253798149	0.093774163	-2.706482704	0.006800012	0.136396445
Git1	2385.886	-0.2635066	0.09743284	-2.704495	0.006840836	0.1365679
Meox1	772.1878	-0.3470509	0.1283633	-2.703662	0.006858005	0.1366822
Med25	2997.173043	-0.255573714	0.094553165	-2.702963077	0.006872438	0.136802633
Sf3a1	4278.55	-0.3099241	0.1147926	-2.699862	0.006936834	0.1370802
Cldn5	484.6075	-0.3041514	0.1128213	-2.695869	0.007020538	0.1380649
Lfng	752.2914329	-0.288681274	0.107372555	-2.688594615	0.00717535	0.138437548
Dusp4	757.5121852	-0.435807163	0.162264508	-2.685782427	0.007236019	0.138786847
Arhgef15	387.49	-0.2565288	0.09563522	-2.682368	0.007310304	0.1398825
Tle3	4170.668073	-0.255795809	0.09541106	-2.680986981	0.007340537	0.140132058
Dusp23	152.5685465	-0.344983684	0.128734974	-2.679797681	0.007366667	0.1404664
Spocd1	2.640846101	-1.745279345	0.651462236	-2.679018441	0.007383833	NA
Hcn2	22.1097	-0.6979172	0.2616566	-2.667302	0.007646286	0.1439462
Aven	296.8212736	-0.27958655	0.105117872	-2.659743241	0.007820024	0.145138126
Cecr2	1343.626151	-0.255723427	0.096149611	-2.659640793	0.007822403	0.145138126
Derl3	35.1693	-0.4568471	0.1718575	-2.65829	0.007853818	0.1452606
Slc24a3	99.06341924	-0.324749177	0.122174231	-2.658082437	0.007858667	0.145260594
Cabp1	183.3222079	-0.372250319	0.140101656	-2.657001564	0.007883908	0.145397452
Fhod1	856.8626669	-0.253796522	0.095571038	-2.655579825	0.007917219	0.145556487
4933413G19Rik	27.8244862	-0.518703228	0.195514526	-2.653016323	0.007977601	0.146210099
Ddit4	1463.363	-0.2763522	0.1049045	-2.634322	0.008430549	0.15036
Fzd7	2311.370932	-0.302280804	0.114794055	-2.633244408	0.008457346	0.150359997
Cpne2	204.1721985	-0.311025832	0.118195738	-2.631447104	0.00850221	0.150503189
Neurl1a	172.0126	-0.2633312	0.1001839	-2.628477	0.008576813	0.1505032
Myl2	1569.304158	-0.410968164	0.156420152	-2.627335148	0.008605653	0.150503189
Dok5	134.7164594	-0.257870488	0.098151325	-2.627274653	0.008607183	0.150503189
D130058E05Rik	45.9030749	-0.455017911	0.173603349	-2.621020349	0.008766703	0.151178958
Rara	948.4325	-0.2529689	0.09660962	-2.618465	0.008832636	0.1515773
Tmem132e	295.9638	-0.3824126	0.1462521	-2.61475	0.008929267	0.1525833
Igdcc3	5943.529226	-0.557140152	0.213166429	-2.61363928	0.008958356	0.15276996
Med26	360.1616515	-0.261227677	0.100124615	-2.609025521	0.009080047	0.154264517
Cnnm2	181.5623	-0.3119125	0.1195742	-2.608526	0.009093308	0.1542645
Cited2	1363.535	-0.2785505	0.1069566	-2.604331	0.009205383	0.1550365
Pom121	3110.200672	-0.312660608	0.120144161	-2.602378713	0.009257956	0.15519758
Fam189a2	110.2746	-0.3557426	0.1369747	-2.59714	0.009400351	0.1565413
Hoxa7	315.8480688	-0.308327609	0.118763328	-2.596151634	0.009427445	0.156594815
Cdc42ep1	458.1832	-0.3637173	0.1401444	-2.595304	0.009450739	0.1565948
Mmp15	1120.039537	-0.388343204	0.149724784	-2.593713566	0.009494555	0.156828502
Ccnk	1490.135	-0.2614555	0.1008715	-2.591966	0.009542916	0.1571383
Gar1	1370.2992	-0.288031533	0.111358317	-2.586529155	0.009694797	0.157138304
Fam101a	95.2040439	-0.378854519	0.146546665	-2.585214203	0.009731852	0.157138304
Atoh8	349.2220981	-0.356471526	0.138094468	-2.581359916	0.009841192	0.158069908
Slc37a2	139.1292401	-0.251242268	0.097411103	-2.579195399	0.009903075	0.158284153
Slc45a3	194.81013	-0.289366582	0.112389013	-2.574687443	0.010033071	0.15895933
Dalrd3	695.6730235	-0.253416329	0.0984886	-2.57305239	0.010080595	0.159157546
Lef1	448.7964633	-0.279038718	0.108736668	-2.566187863	0.010282312	0.160886269
Zfp423	1506.610515	-0.341447679	0.133099129	-2.565363742	0.010306769	0.160916194
Fbln7	57.15113886	-0.345233896	0.134748731	-2.562056744	0.010405432	0.161391376
Erg	310.5197	-0.2509903	0.09822749	-2.555195	0.01061285	0.1629202
Foxi3	8.150998962	-0.978125014	0.384265499	-2.54544063	0.010913992	0.164120193
Tcf7	524.1193	-0.3170284	0.1246082	-2.544203	0.01095276	0.1641202
P3h2	197.0829	-0.3288534	0.1294447	-2.540493	0.01106963	0.1648112
Ints5	1332.867	-0.2648267	0.1044353	-2.535797	0.01121917	0.1655944
Krt80	3.961561	-1.2283	0.4846933	-2.53418	0.01127107	NA
Parvb	1316.584	-0.3403623	0.1345634	-2.529383	0.01142632	0.1668972
Bves	133.1629	-0.2556012	0.1011151	-2.527824	0.01147718	0.167214
D630023F18Rik	5.902204242	-1.001906991	0.397183121	-2.522531645	0.011651347	0.168546499
Fam81a	97.42136537	-0.368840618	0.146348854	-2.52028361	0.011726031	0.169006455
Phlda3	396.9714054	-0.299068505	0.118729327	-2.518910125	0.01177187	0.169006455
Sirpa	651.4709647	-0.274901681	0.109189504	-2.517656658	0.011813842	0.169006455
Fsd2	94.50714376	-0.469579986	0.186597875	-2.516534481	0.01185153	0.169006455
Cox7a1	33.34491327	-0.492425633	0.1958023	-2.514912398	0.011906196	0.169006455
Kif19a	104.4879	-0.3328896	0.1323902	-2.514457	0.01192157	0.1690065
Cyp26c1	294.7938	-0.4444771	0.177011	-2.511014	0.01203848	0.1694108
Xbp1	2169.767	-0.3406082	0.1356538	-2.510864	0.01204362	0.1694108
Eda2r	99.9277	-0.3652616	0.1456592	-2.507645	0.01215388	0.1703064
Tnfsf18	4.646206604	-1.280345718	0.511823579	-2.501537192	0.012365545	0.170988538
Tbx20	425.4154497	-0.311602236	0.124666064	-2.499495261	0.012437036	0.171540611
Kbtbd6	136.627	-0.2879452	0.1152374	-2.498713	0.01246454	0.1716185
Cad	4363.810871	-0.326270661	0.130696408	-2.496401142	0.012546063	0.172315477
Pak4	1311.015565	-0.275658698	0.11051674	-2.494270979	0.012621615	0.172635116
Hmga1	11584.1	-0.3113588	0.1250928	-2.489022	0.0128095	0.1738828
Kat2a	1794.814	-0.2514709	0.1010914	-2.487561	0.01286226	0.1741525
1700001O22Rik	38.04156212	-0.412977571	0.166132864	-2.485827071	0.012925076	0.174152522
Pygm	170.3829	-0.4273227	0.1719485	-2.485178	0.01294868	0.1741525
Sf3b4	2223.206876	-0.329276635	0.132513488	-2.484853726	0.012960468	0.174152522
Ppp1r3d	98.52958076	-0.298149385	0.120326469	-2.477837057	0.013218149	0.176202364
Rps6ka1	810.3709869	-0.269102444	0.108629476	-2.477250699	0.013239887	0.176329824
Nptxr	130.8958	-0.386358	0.1560855	-2.475298	0.01331252	0.1770173
Kdm6a	1635.279	-0.3251022	0.1314992	-2.472275	0.01342563	0.1772921
BC068281	285.0123	-0.2563688	0.1037029	-2.472148	0.0134304	0.1772921
Acoxl	10.55996536	-0.770512409	0.312229021	-2.467779603	0.0135954	0.178746616
Prr18	25.6808	-0.50121	0.2032866	-2.465533	0.01368094	0.1792929
Agpat1	1857.066	-0.2519094	0.1022361	-2.463997	0.01373974	0.1798575
Fbxo32	150.7163	-0.3480218	0.1412523	-2.463831	0.01374609	0.1798575
Sox10	497.9321	-0.3768052	0.1529723	-2.463225	0.01376937	0.1800176
Gata5	144.3669238	-0.433463475	0.176082806	-2.461702454	0.013827933	0.180349435
Guca1b	27.44498	-0.5300644	0.2158838	-2.455323	0.01407581	0.1816926
Cdk18	114.0915817	-0.331840283	0.135305384	-2.452528302	0.014185622	0.181939722
Tacr1	17.32934696	-0.616784852	0.251681201	-2.450659206	0.014259489	0.182430445
Synpo2l	287.3861	-0.4477815	0.1828498	-2.448903	0.0143292	0.1825167
Rfx2	240.2555	-0.3086582	0.1262405	-2.445001	0.01448519	0.1835446
Oas3	2.269683153	-1.5897491	0.650758155	-2.442918444	0.014569029	NA
Myl4	2195.177	-0.3618944	0.1481623	-2.442554	0.01458376	0.1841666
Myl3	993.7170014	-0.517777229	0.212269477	-2.439244849	0.014717992	0.185428409
4933404O12Rik	185.3867951	-0.303449799	0.124486359	-2.437614863	0.014784516	0.185734962
Fkbp2	663.5207	-0.2789509	0.1144473	-2.437375	0.01479433	0.185735
Zswim1	235.6581153	-0.297314432	0.122236311	-2.432292254	0.015003596	0.186435687
Gid4	1123.335	-0.2523729	0.1038959	-2.429094	0.0151366	0.1870902
Aldh1a2	1026.554478	-0.333222234	0.137344526	-2.426177757	0.015258794	0.18773834
Hoxc6	638.2331	-0.2586139	0.1066099	-2.425797	0.01527483	0.1877383
Hmga1-rs1	117.7134	-0.3658188	0.1509497	-2.423449	0.0153739	0.1877383
Sall4	708.9114465	-0.434434952	0.179322332	-2.422648361	0.015407833	0.18773834
Hspb7	339.2688493	-0.561583763	0.231972534	-2.420906281	0.015481868	0.187783322
Sec1	64.67569263	-0.481831829	0.199134338	-2.419632064	0.015536218	0.187783322
3425401B19Rik	35.27272	-0.5510716	0.2278915	-2.418131	0.01560044	0.1877833
Metrn	239.8522	-0.3149566	0.1302889	-2.41737	0.01563311	0.1877833
Igf2bp1	7185.905	-0.2661436	0.1101298	-2.416636	0.01566469	0.1877833
2410016O06Rik	332.9617	-0.2745137	0.1135943	-2.416614	0.01566561	0.1877833
Ibsp	6.807713064	-0.953766326	0.394894743	-2.415241892	0.015724763	0.1880857
Fer1l5	172.4139149	-0.26269758	0.108932204	-2.411569491	0.015884025	0.188571363
2810455O05Rik	38.87959639	-0.384798372	0.159679661	-2.409814561	0.015960631	0.189096486
Mzb1	6.652009	-0.8159555	0.3390376	-2.406681	0.01609821	0.189762
Hspd1	18589.13699	-0.255002396	0.105965592	-2.406464136	0.016107786	0.189761991
Bag2	491.3163257	-0.25185959	0.104779308	-2.403714958	0.016229422	0.18979348
9230112E08Rik	103.6979523	-0.322870574	0.134341921	-2.403349393	0.016245657	0.18979348
2610528A11Rik	21.49621	-0.9217178	0.3835774	-2.402951	0.01626336	0.1897935
Csrp3	381.1914671	-0.380205633	0.158322278	-2.401466412	0.016329508	0.190366317
Fscn1	11142.5322	-0.371468688	0.154726863	-2.400802813	0.016359149	0.190366317
Cnn1	248.8644069	-0.374419677	0.156157548	-2.397704635	0.016498163	0.191290205
Mylk3	237.0886398	-0.275551633	0.115083536	-2.394361896	0.016649312	0.192161854
Tcof1	2472.126	-0.3163325	0.13217	-2.393375	0.01669416	0.1923722
Pigt	1331.03082	-0.282055829	0.117869992	-2.392940094	0.01671397	0.192434922
C2cd4c	30.73782	-0.4858718	0.2035684	-2.386774	0.01699695	0.1932366
Zc3h3	379.8828	-0.2572835	0.1080113	-2.382007	0.01721858	0.1948054
Thbd	186.7690097	-0.274023776	0.115212851	-2.378413295	0.017387325	0.196034279
Nrgn	78.81647346	-0.343097646	0.144458519	-2.375059962	0.0175461	0.196871343
Myl7	1722.643	-0.5113238	0.2157003	-2.370529	0.01776267	0.19821
Rtn4rl1	58.97157	-0.401631	0.169465	-2.369994	0.01778838	0.1983611
Zfp341	159.6872811	-0.310568607	0.131100311	-2.368938752	0.017839207	0.198791933
Cabp5	7.156605196	-0.869584462	0.367521441	-2.366078177	0.017977648	0.20002886
Pbdc1	1779.439	-0.3301869	0.1396521	-2.364352	0.01806163	0.2000726
Gpr182	116.5776	-0.331854	0.140367	-2.364187	0.01806968	0.2000726
Ppp2r2c	71.50404544	-0.345157299	0.146003149	-2.364040095	0.018076856	0.20007263
4930524J08Rik	44.09481663	-0.354979768	0.150355487	-2.360936562	0.018228849	0.200221587
Pabpc1	20563.5	-0.2724438	0.1155274	-2.358263	0.0183607	0.2003578
Cygb	64.99093	-0.316841	0.1344185	-2.357124	0.0184171	0.2004192
4930509E16Rik	5.141100792	-1.010970586	0.429740292	-2.352515238	0.018646926	0.201191814
Bahd1	691.1156145	-0.265163547	0.112772956	-2.351304403	0.018707722	0.20131485
Kbtbd11	736.7767382	-0.380133278	0.161713194	-2.350663346	0.01873998	0.201363147
Zfp553	1468.747344	-0.316241429	0.135310836	-2.337147852	0.019431498	0.204557997
Scn4b	52.89396918	-0.619640835	0.265141172	-2.337022315	0.019438024	0.204557997
Alpk2	114.3222	-0.4234246	0.1814276	-2.333849	0.01960363	0.2053522
Dnajc19-ps	8.477521482	-0.939434602	0.402654624	-2.333102728	0.019642754	0.205352159
Elfn1	59.4944421	-0.401325054	0.172171476	-2.330961337	0.019755398	0.205384776
A730061H03Rik	1.670753	-1.636678	0.7031589	-2.327608	0.01993294	NA
Ccdc117	1260.983	-0.2533454	0.1088644	-2.327165	0.01995646	0.2060482
Actn2	657.8458	-0.4354198	0.1872372	-2.325498	0.02004536	0.206258
Mlip	44.38587343	-0.45899587	0.197466823	-2.324420185	0.020102985	0.206258025
Alkbh2	90.86513427	-0.288779857	0.124417489	-2.321055177	0.020283866	0.207457885
Pcbp1	8332.137609	-0.285400277	0.123022441	-2.319904203	0.02034606	0.20783322
Cand2	3140.978459	-0.256273741	0.110518003	-2.318841578	0.020403628	0.20808879
Nfkb2	304.6768	-0.2843644	0.1231163	-2.309721	0.0209036	0.2110163
Dagla	230.1476	-0.2810377	0.1217335	-2.30863	0.02096413	0.2113952
Zfp493	152.0113	-0.2837355	0.1229367	-2.30798	0.02100025	0.2115603
Wnt1	148.8941	-0.4196248	0.1818944	-2.30697	0.02105649	0.2117006
Hspa1a	13.27844	-1.087927	0.4719181	-2.30533	0.02114809	0.2121372
Ttc41	138.7534	-0.3266109	0.1425781	-2.290751	0.0219778	0.2166289
Tmem28	91.3108	-0.495096	0.2163785	-2.288101	0.02213161	0.217363
Zfp574	960.1121335	-0.264972448	0.116003288	-2.28418049	0.022360926	0.218073428
Ak4	1275.420263	-0.278208296	0.121968371	-2.280987231	0.022549202	0.218561027
Rspo4	149.8624954	-0.331007932	0.145351387	-2.277294626	0.022768638	0.219773298
E230020A03Rik	58.14897408	-0.448615342	0.197067423	-2.276456126	0.022818724	0.220126421
Oit1	6.020864	-0.8363763	0.3683037	-2.270888	0.02315378	0.2216191
Cox6a2	89.92612022	-0.476748917	0.210353791	-2.266414673	0.023426006	0.223120677
Dpcr1	9.618429	-0.8429487	0.3720518	-2.265675	0.02347126	0.2231207
Jph1	102.5735541	-0.280812259	0.124247958	-2.26009557	0.02381532	0.224289804
Rimbp3	38.13388	-0.4162944	0.1842368	-2.259562	0.02384844	0.2242898
Smtnl2	443.2196	-0.2870503	0.1271126	-2.258237	0.0239309	0.2242898
Msi1	4082.897398	-0.277652555	0.123314495	-2.251580844	0.024348773	0.226462397
Polr2a	7605.706	-0.2804509	0.1246452	-2.249994	0.02444934	0.2264624
Chst7	80.83162	-0.3980301	0.1769031	-2.24999	0.02444961	0.2264624
Platr5	2.860453547	-1.203188263	0.534945416	-2.2491795	0.024501078	NA
Mmp17	192.6110367	-0.341889251	0.152069604	-2.248241871	0.024560771	0.226585696
Acta2	3025.69	-0.293635	0.1307044	-2.246558	0.02466828	0.2269566
Irf5	88.91513312	-0.285277224	0.127001844	-2.246244743	0.024688336	0.227012938
Zfp319	728.9941372	-0.255872611	0.114076551	-2.24299041	0.024897433	0.228157261
Zfp879	35.49261	-0.4357602	0.1942943	-2.242784	0.02491075	0.2281573
Fam222b	693.0238	-0.2598206	0.1158627	-2.242487	0.02492993	0.2282048
Ppard	525.1583	-0.2765046	0.1234508	-2.239796	0.02510416	0.2290281
Slc8a1	456.4083	-0.2645857	0.1182681	-2.237169	0.02527532	0.2298435
Pcdhga12	97.92657	-0.3067748	0.1372962	-2.234402	0.02545665	0.230824
Pomgnt2	225.5284897	-0.27311587	0.122309869	-2.2329831	0.025550059	0.230824
Kcng1	62.66638314	-0.444307012	0.199065859	-2.231959883	0.025617614	0.230824
Mybpc3	1116.036254	-0.460800285	0.206501723	-2.231459759	0.02565069	0.230824
Defb42	8.490421	-0.7282706	0.3268688	-2.228021	0.02587909	0.2321107
Pim2	151.9478	-0.2872946	0.1289629	-2.227731	0.02589846	0.2321107
Nfatc1	141.2245	-0.2510205	0.112715	-2.227037	0.02594479	0.2321107
Chst12	215.7826274	-0.274583643	0.123457978	-2.224106117	0.026141305	0.232758986
Wdtc1	1245.060287	-0.280303858	0.126140231	-2.22216065	0.026272451	0.233142912
Olig3	351.3334	-0.4149844	0.187431	-2.214065	0.02682429	0.2354969
Proser3	440.9431133	-0.258019304	0.11666788	-2.211571035	0.026996319	0.236117071
Prrc2a	13872.8	-0.2513189	0.1136721	-2.210911	0.02704198	0.2362225
Sag	15.86333208	-0.61768896	0.279969534	-2.206272058	0.027364957	0.237067895
Jph2	310.2504291	-0.382619977	0.173474975	-2.205620586	0.027410576	0.237067895
Hoxa1	78.33408428	-0.322138962	0.146180192	-2.20371145	0.027544643	0.237346893
Slit1	655.3587	-0.3453094	0.1568924	-2.200932	0.02774082	0.2379192
Ywhag	6790.710967	-0.266210481	0.121312322	-2.194422431	0.028205055	0.238486617
Inhbe	1.155651	-1.970591	0.8980152	-2.194385	0.02820776	NA
Adora2a	123.2903	-0.3401126	0.1550668	-2.19333	0.02828359	0.2384866
D030025E07Rik	23.65602922	-0.533875082	0.243411437	-2.193303195	0.028285542	0.238486617
Blk	3.52914	-1.046871	0.4783563	-2.188475	0.02863503	NA
Klk9	6.188453428	-0.864429891	0.395784403	-2.184092866	0.028955425	0.240601575
Flt1	479.1075173	-0.267637741	0.123586216	-2.1655954	0.030342118	0.246544152
Tnni3k	20.89216882	-0.47577843	0.219766515	-2.164926857	0.030393287	0.246640995
2500002B13Rik	108.4574615	-0.308135322	0.142387612	-2.164059905	0.030459752	0.246931736
1700026J14Rik	1.585404178	-1.794927068	0.829746376	-2.163223751	0.030523974	NA
Hk1	1378.788	-0.3129685	0.1447085	-2.162752	0.03056027	0.2469317
Sall1	1100.834142	-0.306214935	0.14165327	-2.16172161	0.030639641	0.246931736
Wasf1	920.9402	-0.3037453	0.1405258	-2.161492	0.03065738	0.2469317
Ormdl2	307.5957	-0.290424	0.1345565	-2.158379	0.03089841	0.2476582
Iqch	5.771283309	-0.848916402	0.39394148	-2.154930224	0.031167295	0.248348195
1700030C10Rik	3.077543	-1.438291	0.670014	-2.146659	0.03182047	NA
Sp2	661.3899	-0.2720471	0.1267637	-2.146096	0.03186531	0.2512089
Lppr5	27.09919009	-0.518564601	0.241807043	-2.144538859	0.031989735	0.251337745
Cyp26a1	317.5906	-0.3014802	0.1408847	-2.139908	0.03236223	0.2524408
Myh6	3487.965	-0.495491	0.2318726	-2.13691	0.03260532	0.2533673
Ankrd34a	32.89000753	-0.38458318	0.18006638	-2.13578559	0.032696894	0.253745475
Lrrc10	27.97919	-0.5836069	0.2735149	-2.13373	0.03286493	0.2540978
Gimap1	52.60883561	-0.321153878	0.151126571	-2.125065608	0.033581139	0.256668217
Tcea3	56.41589588	-0.368474142	0.173726679	-2.120999174	0.033921872	0.257482618
Naprt	72.28825	-0.3175433	0.1499049	-2.118298	0.0341498	0.2579091
Lrp5	1560.352	-0.2553351	0.1206394	-2.116514	0.0343011	0.2582312
Pnma1	48.30904	-0.3800207	0.1797107	-2.114624	0.03446197	0.2582312
6330403A02Rik	146.5268249	-0.391213523	0.185300866	-2.111234185	0.034752188	0.258599237
Spata2	526.5159187	-0.262920426	0.124643882	-2.109372892	0.034912407	0.258599237
Sox18	322.0814505	-0.330915211	0.156934258	-2.108623159	0.034977122	0.258599237
Hoxb9	991.1807	-0.3601249	0.170818	-2.108237	0.03501049	0.2585992
Hrc	146.9857485	-0.275902866	0.130932215	-2.107219119	0.03509859	0.258685497
Nkx2-6	34.11887	-0.6310037	0.2995139	-2.106759	0.03513843	0.258757
Mpp2	614.0755	-0.2860688	0.1357874	-2.106741	0.03514003	0.258757
Zbtb39	1132.247	-0.2513075	0.1194811	-2.103325	0.03543741	0.2596567
Man1c1	405.4054356	-0.253770408	0.120837551	-2.100095596	0.035720433	0.260241419
4931440J10Rik	1.064929	-1.973018	0.9411472	-2.096397	0.03604703	NA
Gata3	184.543066	-0.265110927	0.126827171	-2.090332258	0.036587964	0.262541184
Ppp1r1b	5.038974	-0.793065	0.380218	-2.085816	0.03699527	0.2637805
Slc12a5	353.6462618	-0.272290197	0.130620029	-2.084597577	0.037105845	0.263780516
Zfp385a	1151.525	-0.3071272	0.1473711	-2.08404	0.03715654	0.2637805
Tnfsf9	84.02089	-0.2657462	0.1276332	-2.082109	0.0373325	0.2642778
Ube2n-ps1	32.10512201	-0.37004122	0.177826178	-2.080915324	0.037441657	0.264476317
Tbxa2r	45.417	-0.3601552	0.1732909	-2.078328	0.0376792	0.2650065
Sox13	1340.83464	-0.296207552	0.142692666	-2.075842863	0.037908487	0.265584701
2610204G07Rik	17.25062	-0.6303055	0.3036635	-2.075671	0.03792438	0.2655847
Gja4	195.1540362	-0.302294994	0.146100135	-2.069094552	0.038537215	0.268031788
Disc1	54.17771425	-0.284029063	0.137325409	-2.068292137	0.038612561	0.26831263
Itpk1	338.7361	-0.2897559	0.1401623	-2.067288	0.03870707	0.2686425
Tcf7l1	993.6508695	-0.275976288	0.133579387	-2.066009548	0.038827578	0.269135206
Myoz1	21.23889	-0.5600064	0.2714945	-2.06268	0.039143	0.2699547
Ppm1j	41.09719289	-0.378262161	0.183416525	-2.062312338	0.039178009	0.269957347
Trim63	76.30496338	-0.292349765	0.141945939	-2.059585272	0.039438205	0.270151707
Bcl3	16.46446384	-0.602837147	0.292745276	-2.05925491	0.039469826	0.270254752
Hspb3	19.34808	-0.4907559	0.2387364	-2.055639	0.03981729	0.2712667
Tnfrsf25	67.49034601	-0.397004407	0.193459265	-2.052134378	0.040156605	0.272213359
Chrdl2	7.823065671	-0.803992151	0.392435497	-2.04872433	0.040489079	0.273131874
Lin28a	1221.579819	-0.569864204	0.278286493	-2.047760922	0.040583431	0.273131874
Dennd2a	1646.363534	-0.252591256	0.123422246	-2.046561818	0.040701127	0.273300731
Etohd2	39.49008	-0.3492069	0.1707672	-2.04493	0.04086178	0.2733007
Rps12-ps3	86.32693	-0.3152023	0.1543127	-2.04262	0.04109009	0.2739844
Hps6	90.91153	-0.2631992	0.1288866	-2.042099	0.04114168	0.2742162
Rftn1	143.0478	-0.2858806	0.1401615	-2.039651	0.04138506	0.2748524
Clec1b	202.4302569	-0.250939408	0.123036824	-2.039547192	0.041395446	0.274852449
Trim17	29.09597	-0.5203761	0.2552415	-2.038759	0.04147405	0.2749437
Anxa9	44.27231371	-0.32036163	0.157167101	-2.038350442	0.041514899	0.274943693
Sfrp2	1212.326135	-0.33966004	0.166705089	-2.037490529	0.04160091	0.274943693
Srpk3	66.41627	-0.3174599	0.1558429	-2.03705	0.04164499	0.2749437
Rhbdl3	541.3567	-0.2905141	0.1429755	-2.031915	0.04216221	0.2759682
C230057A21Rik	6.927244843	-0.775676163	0.382214665	-2.029425435	0.042414977	0.276596545
Hk3	60.9672	-0.3271864	0.1613508	-2.027795	0.04258117	0.2770155
Jpx	95.69268	-0.354708	0.1751043	-2.025696	0.04279596	0.2773062
Kcng2	39.48184	-0.5473332	0.2710432	-2.019358	0.04345005	0.2791041
Adssl1	125.1096	-0.2630079	0.1303064	-2.01838	0.04355175	0.2792501
Rps12-ps5	1.889751528	-1.292000995	0.642084499	-2.012197768	0.044199094	NA
Rpp38	225.8868808	-0.263745767	0.131124291	-2.011418056	0.044281318	0.281143685
Cpne5	112.5835	-0.3515773	0.174792	-2.011404	0.04428278	0.2811437
A430046D13Rik	69.5201	-0.3007687	0.1495938	-2.010569	0.04437098	0.2813364
Plxnd1	2555.600135	-0.327317175	0.162995454	-2.008136835	0.044628753	0.282158627
Mif	15253.55	-0.255232	0.1277196	-1.998378	0.04567573	0.2850886
Ppp1r3g	27.1461	-0.5409019	0.2710402	-1.995652	0.04597182	0.2861012
Spsb4	1111.748597	-0.297761674	0.149394016	-1.993129855	0.04624723	0.28711675
Fcrl6	10.43133205	-0.599844811	0.301215077	-1.991416957	0.046435067	0.287240761
Plvap	912.7702729	-0.326794755	0.164539112	-1.986122031	0.047019776	0.288833234
Pla2g4c	160.4348351	-0.293996017	0.148087296	-1.985288579	0.047112374	0.289069363
Tspan18	1326.276423	-0.316444438	0.159840142	-1.979755733	0.047730983	0.29045089
Nlrp5-ps	53.26596727	-0.471226555	0.23813723	-1.978802543	0.047838242	0.290468105
Sh3bgr	429.9007	-0.3397416	0.1721823	-1.973151	0.04847841	0.2919659
Banp	1019.102136	-0.297240966	0.150706462	-1.972317326	0.048573393	0.291965927
Ybx1-ps2	68.81967063	-0.303034487	0.153843614	-1.969756687	0.048866263	0.292247499
4732456N10Rik	9.979214	-0.5912872	0.3002758	-1.969147	0.04893621	0.2923155
Myrf	1608.077	-0.3055981	0.1553816	-1.966758	0.04921107	0.2927056
Tnni3	411.1046242	-0.301038561	0.153215993	-1.964798553	0.049437558	0.293190434
Cx3cl1	126.7378575	-0.310020264	0.158111817	-1.960765935	0.049906334	0.294577464
