# Supplementary material for: SORBS2 is a genetic factor contributing to cardiac malformation of 4q deletion syndrome patients
Source: eLife. 2021 Jun 8;10:e67481. doi: 10.7554/eLife.67481 (PMC8186900; doi:10.7554/eLife.67481)
Supplement: Supplementary file 8. [file elife-67481-supp8.xlsx]

## Sheet: Sheet1
	Chr	Start	Ref	Alt	Gene.refGene	Variant type	AAChange.refGene	ExAC_ALL	ExAC_EAS	1000g2015aug_all	1000g2015aug_eas	SIFT_pred	Polyphen2_HDIV_pred	MutationTaster_pred
P1	4	185589777	G	A	SORBS2	Missense	NM_003603:exon22:c.C1841T:p.A614V	0.0005	0.0068	0.00159744	0.0079	D	B	D
P1	2	144396583	G	A	ZEB2	Missense	NM_001171653:exon8:c.C2824T:p.L942F	.	.	.	.	T	D	D
P2	4	185677121	C	A	SORBS2	Missense	NM_001145673:exon5:c.G368T:p.G123V	0.0002	0.0064	0.000798722	0.004	D	P	D
P2	12	115961280	T	C	MED13L	Missense	NM_015335:exon31:c.A6619G:p.M2207V	8.24e-06	0.0001	.	.	D	P	D
P2	3	132722024	G	A	NPHP3	Missense	NM_153240:exon1:c.C332T:p.S111F	1.71e-05	0	.	.	D	P	D
P3	4	185638084	G	A	SORBS2	Missense	NM_003603:exon12:c.C901T:p.R301C	6.645e-05	0	0.000199681	.	D	D	D
P3	5	173232641	A	T	NKX2-5	Missense	NM_004387:exon2:c.T903A:p.N301K	1.679e-05	0.0002	.	.	D	D	D
P4	4	185589777	G	A	SORBS2	Missense	NM_003603:exon22:c.C1841T:p.A614V	0.0005	0.0068	0.00159744	0.0079	D	B	D
P5	4	185677121	C	A	SORBS2	Missense	NM_001145673:exon5:c.G368T:p.G123V	0.0002	0.0064	0.000798722	0.004	D	P	D
P6	4	185589777	G	A	SORBS2	Missense	NM_003603:exon22:c.C1841T:p.A614V	0.0005	0.0068	0.00159744	0.0079	D	B	D
P6	7	74035385	G	C	ELN	Missense	NM_000501:exon2:c.G104C:p.G35A	1.658e-05	0.0001	.	.	D	D	D
P6	1	147758760	C	T	GJA5	Missense	NM_005266:exon2:c.G479A:p.R160H	.	.	.	.	D	D	D
P6	2	144399696	T	G	ZEB2	Missense	NM_001171653:exon7:c.A1419C:p.Q473H	8.26e-06	0.0001	0.000199681	0.001	D	B	D
P7	4	185624436	G	T	SORBS2	Missense	NM_021069:exon13:c.C981A:p.N327K	4.958e-05	0.0006	0.000199681	.	D	B	D
P7	12	47989762	G	A	COL2A1	Missense	NM_033150:exon16:c.C860T:p.P287L	2.485e-05	0	0.000199681	.	T	D	D
P7	15	66781065	A	C	SMAD6	Missense	NM_005585:exon4:c.A1021C:p.T341P	.	.	.	.	D	D	D
P8	4	185624007	G	C	SORBS2	Missense	NM_021069:exon13:c.C1410G:p.I470M	7.414e-05	0.0009	.	.	D	B	D
P8	17	17795068	C	G	RAI1	Missense	NM_030665:exon3:c.C2120G:p.S707C	1.649e-05	0.0002	.	.	D	D	N
P9	4	185589777	G	A	SORBS2	Missense	NM_003603:exon22:c.C1841T:p.A614V	0.0005	0.0068	0.00159744	0.0079	D	B	D
P10	4	185589777	G	A	SORBS2	Missense	NM_003603:exon22:c.C1841T:p.A614V	0.0005	0.0068	0.00159744	0.0079	D	B	D
P10	15	58014250	T	C	ALDH1A2	Missense	NM_003888:exon2:c.A149G:p.E50G	0.0003	0.0043	0.000399361	0.002	D	B	D
P10	17	17793733	G	A	RAI1	Missense	NM_030665:exon3:c.G785A:p.R262Q	2.593e-05	0	.	.	D	D	D
P11	4	185623720	C	A	SORBS2	Missense	NM_021069:exon13:c.G1697T:p.R566L	.	.	.	.	D	B	D
P11	4	5625874	G	C	EVC2	Missense	NM_001166136:exon13:c.C1681G:p.L561V	.	.	.	.	D	D	D
P12	4	185678506	C	T	SORBS2	Missense	NM_001270771:exon7:c.G172A:p.G58R	.	.	.	.	D	D	D
P12	9	91733124	C	T	ROR2	Missense	NM_001318204:exon6:c.G935A:p.R312H	0.0006	0.0064	0.00179712	0.0069	D	P	D
P13	4	185623171	C	T	SORBS2	Missense	NM_021069:exon13:c.G2246A:p.G749E	8.241e-06	0.0001	.	.	D	D	D
P13	4	5615512	C	G	EVC2	Missense	NM_001166136:exon16:c.G2499C:p.K833N	9.06e-05	0.0013	0.000199681	0.001	D	D	D
P13	14	23386058	C	T	MYH6	Missense	NM_002471:exon34:c.G5033A:p.R1678Q	2.472e-05	0	.	.	D	D	D
P14	4	185589777	G	A	SORBS2	Missense	NM_003603:exon22:c.C1841T:p.A614V	0.0005	0.0068	0.00159744	0.0079	D	B	D
P14	12	49054098	G	A	KMT2D	Missense	NM_003482:exon5:c.C553T:p.R185C	0.0001	0.0004	0.000199681	0.001	T	D	D
P15	4	185646669	G	A	SORBS2	Missense	NM_003603:exon11:c.C821T:p.P274L	.	.	.	.	D	D	D
P16	4	185623001	C	T	SORBS2	Missense	NM_021069:exon13:c.G2416A:p.G806R	.	.	.	.	D	D	D
P16	8	60821922	C	T	CHD7	Missense	NM_017780:exon10:c.C2830T:p.R944C	2.847e-05	0	.	.	D	D	D
P17	4	185589777	G	A	SORBS2	Missense	NM_003603:exon22:c.C1841T:p.A614V	0.0005	0.0068	0.00159744	0.0079	D	B	D
P17	4	5797176	G	A	EVC	Missense	NM_001306090:exon14:c.G2041A:p.E681K	0.0001	0.002	0.00179712	0.0089	D	D	D
P17	12	112489068	C	T	PTPN11	Missense	NM_001330437:exon13:c.C1504T:p.R502W	.	.	.	.	D	D	D
P18	4	185589777	G	A	SORBS2	Missense	NM_003603:exon22:c.C1841T:p.A614V	0.0005	0.0068	0.00159744	0.0079	D	B	D
P19	4	185624007	G	C	SORBS2	Missense	NM_021069:exon13:c.C1410G:p.I470M	7.414e-05	0.0009	.	.	D	B	D
P20	4	185589777	G	A	SORBS2	Missense	NM_003603:exon22:c.C1841T:p.A614V	0.0005	0.0068	0.00159744	0.0079	D	B	D
P20	4	185649524	G	T	SORBS2	Missense	NM_003603:exon10:c.C650A:p.P217Q	3.397e-05	0	0.000199681	.	D	D	D

## Sheet: Sheet2
	Chr	Start	Ref	Alt	Gene.refGene	Variant type	AAChange.refGene	ExAC_ALL	ExAC_EAS	1000g2015aug_all	1000g2015aug_eas	SIFT_pred	Polyphen2_HDIV_pred	MutationTaster_pred
P1	2	144396583	G	A	ZEB2	Missense	NM_001171653:exon8:c.C2824T:p.L942F	.	.	.	.	T	D	D
P2	12	115961280	T	C	MED13L	Missense	NM_015335:exon31:c.A6619G:p.M2207V	8.24e-06	0.0001	.	.	D	P	D
P2	3	132722024	G	A	NPHP3	Missense	NM_153240:exon1:c.C332T:p.S111F	1.71e-05	0	.	.	D	P	D
P3	5	173232641	A	T	NKX2-5	Missense	NM_004387:exon2:c.T903A:p.N301K	1.679e-05	0.0002	.	.	D	D	D
P6	7	74035385	G	C	ELN	Missense	NM_000501:exon2:c.G104C:p.G35A	1.658e-05	0.0001	.	.	D	D	D
P6	1	147758760	C	T	GJA5	Missense	NM_005266:exon2:c.G479A:p.R160H	.	.	.	.	D	D	D
P6	2	144399696	T	G	ZEB2	Missense	NM_001171653:exon7:c.A1419C:p.Q473H	8.26e-06	0.0001	0.000199681	0.001	D	B	D
P7	12	47989762	G	A	COL2A1	Missense	NM_033150:exon16:c.C860T:p.P287L	2.485e-05	0	0.000199681	.	T	D	D
P7	15	66781065	A	C	SMAD6	Missense	NM_005585:exon4:c.A1021C:p.T341P	.	.	.	.	D	D	D
P8	17	17795068	C	G	RAI1	Missense	NM_030665:exon3:c.C2120G:p.S707C	1.649e-05	0.0002	.	.	D	D	N
P10	15	58014250	T	C	ALDH1A2	Missense	NM_003888:exon2:c.A149G:p.E50G	0.0003	0.0043	0.000399361	0.002	D	B	D
P10	17	17793733	G	A	RAI1	Missense	NM_030665:exon3:c.G785A:p.R262Q	2.593e-05	0	.	.	D	D	D
P11	4	5625874	G	C	EVC2	Missense	NM_001166136:exon13:c.C1681G:p.L561V	.	.	.	.	D	D	D
P12	9	91733124	C	T	ROR2	Missense	NM_001318204:exon6:c.G935A:p.R312H	0.0006	0.0064	0.00179712	0.0069	D	P	D
P13	4	5615512	C	G	EVC2	Missense	NM_001166136:exon16:c.G2499C:p.K833N	9.06e-05	0.0013	0.000199681	0.001	D	D	D
P13	14	23386058	C	T	MYH6	Missense	NM_002471:exon34:c.G5033A:p.R1678Q	2.472e-05	0	.	.	D	D	D
P14	12	49054098	G	A	KMT2D	Missense	NM_003482:exon5:c.C553T:p.R185C	0.0001	0.0004	0.000199681	0.001	T	D	D
P16	8	60821922	C	T	CHD7	Missense	NM_017780:exon10:c.C2830T:p.R944C	2.847e-05	0	.	.	D	D	D
P17	4	5797176	G	A	EVC	Missense	NM_001306090:exon14:c.G2041A:p.E681K	0.0001	0.002	0.00179712	0.0089	D	D	D
P17	12	112489068	C	T	PTPN11	Missense	NM_001330437:exon13:c.C1504T:p.R502W	.	.	.	.	D	D	D
